# Supplementary material
Source: ML conference proceedings conference paper supplement (https://openreview.net/forum?id=CrwzbjO3aU)
Supplement: supplementary_material [file Main.pdf › Invariant/Main.pdf]

---

# Multi-Agent Learning under Uncertainty: Recurrence vs. Concentration

---

Anonymous Author(s)

Affiliation

Address

email

## Abstract

In this paper, we examine the convergence landscape of multi-agent learning in continuous games under uncertainty. In more detail, we consider two stochastic models of regularized learning—in continuous and discrete time respectively—and we set out to characterize the long-run behavior of the induced sequence of play. In stark contrast to deterministic, full-information models of learning (or models with a vanishing learning rate), we show that, in general, the resulting dynamics *do not* converge. In lieu of this, we ask instead which actions are played more often in the long run, and by how much. To that end, we show that, despite wandering away from equilibrium infinitely often, the dynamics of regularized learning in strongly monotone games always return to its vicinity in *finite* time (which we estimate), and their long-run distribution is sharply concentrated around a neighborhood thereof. We quantify the degree of this concentration, and we show that these favorable properties may all break down if the underlying game is not strongly monotone—underscoring in this way the limits of regularized learning in the presence of persistent randomness and uncertainty.

## 1 Introduction

In its most abstract form, the basic model for multi-agent learning in games unfolds as follows: (i) At each stage of the process, every participating agent selects an action; (ii) the agents receive a reward determined by their chosen actions and their individual payoff functions; (iii) the agents update their actions and the process repeats. In this general context, the agents have to contend with various—and varying—degrees of uncertainty: (a) uncertainty about the game, the strategic interests of other players, and/or who else is involved in the game; (b) uncertainty about the outcomes of their actions, and which update directions may lead to better outcomes; and (c) uncertainty stemming from the environment, manifesting as random shocks to the players’ payoffs and/or other disturbances.

Our goal in this paper is to quantify the impact of randomness and uncertainty on multi-agent learning; more precisely, we seek to understand the differences that arise in the players’ long-run behavior when such uncertainty is present versus when it is not. A natural framework for exploring this question is within the greater setting of no-regret learning—and, in particular, the family of “*follow-the-regularized-leader*” (FTRL) algorithms and dynamics [34, 55, 56]. This class contains several mainstay learning methods—like online gradient descent (or, in our case, *ascent*) [65], the exponential / multiplicative weights (EW) algorithm and its variants (HEDGE, EXP3, and the like) [3, 4, 36, 60], the TSALLIS-INF forecaster [1, 2, 64], and many others—so it has become practically synonymous with the notion of online learning in games. In view of all this, it is only natural to ask:

*What is the long-run distribution of FTRL under uncertainty?*

*Which actions are played more often, and by how much?*

*Do the dynamics concentrate—and, if so, where?*

37 **Our contributions in the context of related work.** Of course, the interpretation of these questions  
 38 is context-specific, and it depends on the specific learning setting at hand. In this paper, motivated  
 39 by applications to machine learning and data science that typically involve continuous action spaces  
 40 and rewards, we focus on continuous games, and we consider two models of regularized learning, in  
 41 continuous and discrete time respectively.

42 In the continuous-time setting, we model the dynamics of FTRL in the presence of uncertainty as a  
 43 stochastic differential equation (SDE) perturbed by a general Itô diffusion process, i.e., a continuous-  
 44 time martingale with possibly colored and/or correlated components. In the context of *finite* games,  
 45 models of this type have been studied by, among others, Bravo & Mertikopoulos [10], Foster &  
 46 Young [17], Fudenberg & Harris [18] and Mertikopoulos & Moustakas [39], the first two in an  
 47 evolutionary setting, the latter as a continuous-time model of the EW algorithm in the presence of  
 48 random disturbances. Follow-up works in this direction include [10, 11, 15, 22, 24] on *finite* games,  
 49 while [29–31, 42] considered a regularized learning model in convex minimization problems. The  
 50 model which is closest to our own is that of [41, 43], who study the regret properties and guarantees  
 51 of a stochastic version of the dual averaging dynamics of Nesterov [49].

52 At a high level, our findings reveal a crisp dichotomy between games that are *null-monotone* (like  
 53 bilinear min-max games or zero-sum bimatrix games), and *strongly monotone* games (like Kelly  
 54 auctions, Cournot competitions, joint signal covariance optimization problems, etc.). Specifically:

- 55 1. In null-monotone games, uncertainty induces a persistent drift *away from equilibrium*: the  
 56 dynamics reach greater distances from equilibrium in finite time (which we estimate) and they  
 57 require, on average, infinite time to return. In particular, if the game admits an interior equilibrium,  
 58 the dynamics diffuse away—escaping toward infinity or to the boundary of the game’s action  
 59 space—and they exhibit *no concentration* in any region of interior actions.
- 60 2. In strongly monotone games, uncertainty still induces a persistent outward drift, but this is now  
 61 partially countered by the dynamics’ deterministic component. Thus, in stark contrast to the  
 62 null-monotone case, the players’ learning trajectories end up in a near-equilibrium region whose  
 63 size scales with the level of uncertainty, and we estimate both the size of this region and the time  
 64 required to reach it. Paradoxically, the dynamics return with probability 1 arbitrarily close to where  
 65 they started, infinitely often, in a way reminiscent of Poincaré recurrence in bimatrix min-max  
 66 games [45, 51]; however, these returns can be exceedingly far apart, so there is no antinomy.

67 In discrete time, we consider a standard implementation of FTRL with a constant learning rate and  
 68 stochastic first-order oracle feedback. Variants with a vanishing learning rate have been studied  
 69 extensively in the stochastic approximation literature, and they are known to exhibit favorable  
 70 convergence guarantees in, among others, strongly monotone games, cf. [44, 46] and references  
 71 therein. At the same time however, these properties typically come at the expense of the algorithm  
 72 slowing down to a crawl; for this reason, owing to their simplicity, robustness, and superior empirical  
 73 performance, constant / non-vanishing learning rate schedules are much more common in practice.

74 On the downside, the long-run behavior of FTRL is much less understood in this case. To the best of  
 75 our knowledge, the most relevant results come from recent works by Loizou et al. [37] and Huang  
 76 & Zhang [23], who established upper bounds on the mean distance to equilibrium for stochastic  
 77 gradient descent/ascent in strongly monotone games, and Vlatakis et al. [59], who studied the  
 78 ergodic properties of constant step-size variants of the stochastic extragradient and stochastic gradient  
 79 descent–ascent algorithms for weakly quasi-strongly monotone variational inequalities.

80 One reason that results about the statistics of the long-run behavior of FTRL are particularly scarce  
 81 in the literature is that, in discrete time, even the most basic tools of stochastic analysis are often  
 82 inapplicable. Nevertheless, based in no small part on the insights gained by our continuous-time  
 83 analysis, we manage to establish the following version of the strong-null dichotomy:

- 84 1. In null-monotone games with an unbounded action space, the sequence of play under FTRL drifts  
 85 away to infinity on average (though not necessarily with probability 1).
- 86 2. In strongly monotone games, we show that the mean time required to reach a given distance  
 87 from the game’s equilibrium is finite, and we provide an explicit estimate thereof. If the game’s  
 88 equilibrium is interior, we also show that FTRL converges strongly to a unique invariant measure,  
 89 which is concentrated in a certain region around the game’s equilibrium, which we also estimate.

90 We find these results particularly appealing as they provide the first glimpse into the distributional  
 91 properties of regularized learning in games under uncertainty.

## 92 2 Preliminaries

93 **2.1. Continuous games.** Throughout the sequel, we consider games with a finite number of players  
 94 and a continuum of actions per player. Formally, players will be indexed by  $i \in \mathcal{N} = \{1, \dots, N\}$   
 95 and, during play, each player will be selecting an action  $x_i$  from a closed convex subset  $\mathcal{X}_i$  of some  
 96  $d_i$ -dimensional normed space  $\mathcal{V}_i$ . Aggregating over all players, we will write  $\mathcal{X} = \prod_i \mathcal{X}_i$  for the  
 97 space of the players' joint action profiles  $x = (x_1, \dots, x_N)$  and  $d = \sum_i d_i$  for the dimension of the  
 98 ambient space  $\mathcal{V} = \prod_i \mathcal{V}_i$ . Finally, we will use the shorthand  $x = (x_i; x_{-i})$  when we want to highlight  
 99 the action of player  $i \in \mathcal{N}$  against the action profile  $x_{-i} = (x_j)_{j \neq i}$  of all other players—and, in similar  
 100 notation,  $\mathcal{X}_{-i} = \prod_{j \neq i} \mathcal{X}_j$  for the space thereof.

101 The reward of each player  $i \in \mathcal{N}$  in a given action profile will be determined by an associated payoff  
 102 function  $u_i: \mathcal{X} \rightarrow \mathbb{R}$ , assumed here to be *individually concave*, i.e.,  $u_i(x_i; x_{-i})$  is concave in  $x_i$  for  
 103 all  $x_{-i} \in \mathcal{X}_{-i}$ . We will further assume that each  $u_i$  is  $\beta$ -Lipschitz smooth, and we will write

$$v_i(x) = \nabla_{x_i} u_i(x_i; x_{-i}) \quad \text{and} \quad v(x) = (v_1(x), \dots, v_N(x)) \quad (1)$$

104 for the individual gradient field of each player and the ensemble thereof.<sup>1</sup>

105 The tuple  $\mathcal{G} \equiv \mathcal{G}(\mathcal{N}, \mathcal{X}, u)$  will be referred to as a *concave game* [54]. Mainstay examples of such  
 106 games include (mixed extensions of) finite games, resource allocation problems, Kelly auctions,  
 107 Cournot competitions, etc.; for completeness, we detail some of these applications in [Appendix A](#).

108 **2.2. Nash equilibrium.** The leading solution concept in game theory is that of a *Nash equilibrium*,  
 109 defined here as an action profile  $x^* \in \mathcal{X}$  which discourages unilateral deviations, i.e.,

$$u_i(x^*) \geq u_i(x_i; x_{-i}^*) \quad \text{for all } x_i \in \mathcal{X}_i \text{ and all } i \in \mathcal{N}. \quad (\text{NE})$$

110 A concave game always admits a Nash equilibrium if  $\mathcal{X}$  is compact, and it admits a *unique* equilibrium  
 111 if the game is strongly monotone in the sense below:

112 **Definition 1.** A game  $\mathcal{G} \equiv \mathcal{G}(\mathcal{N}, \mathcal{X}, u)$  is called  $\alpha$ -monotone if there exists some  $\alpha \geq 0$  such that

$$\langle v(x') - v(x), x' - x \rangle \leq -\alpha \|x' - x\|^2 \quad \text{for all } x, x' \in \mathcal{X}. \quad (\text{Mon})$$

113 If  $\alpha > 0$ ,  $\mathcal{G}$  will be called *strongly monotone*; otherwise, if (Mon) holds with  $\alpha = 0$ ,  $\mathcal{G}$  will be called  
 114 (*merely*) *monotone*; finally, if (Mon) binds for  $\alpha = 0$  and all  $x, x' \in \mathcal{X}$ ,  $\mathcal{G}$  will be called *null-monotone*.

115 **2.3. Regularized learning.** In the rest of our paper, we will consider a family of online learning  
 116 schemes adhering to the following “regularized learning” model: players aggregate gradient feedback  
 117 on their payoff functions over time and, at each instance of play, they choose the action which is  
 118 most closely aligned to this aggregate. We provide a detailed description of this model in [Sections 3](#)  
 119 and [4](#)—in continuous and discrete time respectively—and only describe here the core idea.

120 At a high level, the common denominator of these schemes is the way that players choose their  
 121 actions based on the accumulation of payoff gradients over time. Formally, we will treat payoff  
 122 gradients as dual vectors and we will write  $\mathcal{Y}_i := \mathcal{V}_i^*$  for the dual space of  $\mathcal{V}_i$  and  $\mathcal{Y} = \prod_i \mathcal{Y}_i = \mathcal{V}^*$  for  
 123 the ensemble thereof. Then, given an aggregate of gradient steps  $y_i \in \mathcal{Y}_i$ , we will assume that the  $i$ -th  
 124 player chooses an action via a “generalized projection”—or *mirror*—map  $Q_i: \mathcal{Y}_i \rightarrow \mathcal{X}_i$  of the form

$$Q_i(y_i) = \arg \max_{x_i} \{ \langle y_i, x_i \rangle - h_i(x_i) \} \quad \text{for all } y_i \in \mathcal{Y}_i. \quad (2)$$

125 In the above  $h_i: \mathcal{X}_i \rightarrow \mathbb{R}$  is a continuous  $K_i$ -strongly convex function, that is,

$$h_i(\lambda x_i + (1 - \lambda)x'_i) \leq \lambda h_i(x_i) + (1 - \lambda)h_i(x'_i) - \frac{1}{2} K_i \lambda(1 - \lambda) \|x'_i - x_i\|^2 \quad (3)$$

126 for all  $x_i, x'_i \in \mathcal{X}_i$  and all  $\lambda \in [0, 1]$ . This function is known as the *regularizer* of the method and it  
 127 acts as a penalty term that smooths out the “hard”  $\arg \max$  correspondence  $y_i \mapsto \arg \max_i \langle y_i, x_i \rangle$ .  
 128 This regularization scheme has a very long and rich history in game theory and optimization, where  
 129  $Q$  is often referred to as a “*quantal*” or “*regularized*” best response operator, cf. [34, 38, 44, 55, 58]  
 130 and references therein. For concreteness, we describe below the two leading examples of this  
 131 regularization setup (suppressing in both cases the player index  $i \in \mathcal{N}$  for notational clarity):

<sup>1</sup>We are tacitly assuming here that the players' payoff functions are defined in an open neighborhood of  $\mathcal{X}$  in  $\mathcal{V}$ ; this assumption is done only for convenience, and it does not affect any of our results.

132 **Example 1** (Euclidean regularization). Let  $h(x) = \frac{1}{2}\|x\|_2^2$ . Then (B.12) boils down to the Euclidean  
 133 projection map

$$Q(y) = \Pi_{\mathcal{X}}(y) \equiv \arg \max_{x \in \mathcal{X}} \|y - x\|_2. \quad (4)$$

134 Thus, in particular, if  $\mathcal{X} = \mathcal{V}$ , we readily recover the identity map  $Q(y) = y$ .  $\heartsuit$

135 **Example 2** (Entropic regularization). Let  $\mathcal{X} = \{x \in \mathbb{R}_+^d : \sum_{k=1}^d x_k = 1\}$  be the unit simplex of  $\mathbb{R}^d$ ,  
 136 and let  $h(x) = \sum_{k=1}^d x_k \log x_k$  denote the (negative) entropy on  $\mathcal{X}$ . Then (B.12) yields the *logit* map

$$Q(y) = \Lambda(y) \equiv \frac{(\exp(y_1), \dots, \exp(y_d))}{\exp(y_1) + \dots + \exp(y_d)}. \quad (5)$$

137 This map forms the basis of the seminal HEDGE and EXP3 algorithms in online learning, cf. [3, 4,  
 138 12, 34, 36, 55] and references therein.  $\heartsuit$

139 To ease notation in the sequel, we will write  $h(x) := \sum_i h_i(x_i)$  for the players' aggregate regularizer,  
 140  $K := \min_i K_i$  for the strong convexity modulus of  $h$ , and  $Q := \prod_i Q_i : \mathcal{Y} \rightarrow \mathcal{X}$  for the resulting  
 141 ensemble **mirror** map. In the next sections, we describe in detail how this regularization setup is used  
 142 in a learning context.

### 143 3 Learning under uncertainty in continuous time

144 To set the stage for the analysis to come, we begin with two simple games that will serve as “minimal  
 145 working examples” for the more general model and results presented later in this section. We focus  
 146 for the moment on continuous-time interactions; the discrete-time setting is presented in Section 4.

147 **3.1. A gentle start.** Consider the following 2-player, convex-concave min-max games:

$$(a) \text{ Bilinear min-max: } u_1(x_1, x_2) = -u_2(x_1, x_2) = -x_1 x_2 \quad \text{for } x_1, x_2 \in \mathbb{R}. \quad (6a)$$

$$(b) \text{ Quadratic min-max: } u_1(x_1, x_2) = -u_2(x_1, x_2) = x_2^2/2 - x_1^2/2 \quad \text{for } x_1, x_2 \in \mathbb{R}. \quad (6b)$$

148 Both games are monotone and they admit a unique Nash equilibrium at the origin. Their gradient fields  
 149 are  $v(x_1, x_2) = (-x_2, x_1)$  and  $v(x_1, x_2) = -(x_1, x_2)$  respectively, so the first game is *null-monotone*  
 150 and the second one is **1-strongly monotone**. Accordingly, if each player follows their individual  
 151 payoff gradient to increase their rewards, we obtain the gradient descent/ascent dynamics

$$(a) \dot{x}(t) = (-x_2(t), x_1(t)) \quad \text{and} \quad (b) \dot{x}(t) = -(x_1(t), x_2(t)) \quad (\text{GDA})$$

152 for the bilinear and quadratic games (6a) and (6b) respectively. It is then trivial to see that, in the  
 153 bilinear case, (GDA) cycles periodically at a constant distance from the game's equilibrium, whereas,  
 154 in the quadratic case, the dynamics converge to the game's equilibrium at a geometric rate.

155 To model uncertainty in this setting, we will consider the stochastic gradient dynamics

$$dX(t) = v(X(t)) dt + \sigma dW(t) \quad (\text{S-GDA})$$

156 where  $W(t) = (W_1(t), W_2(t))$  is a Brownian motion in  $\mathbb{R}^2$  and  $\sigma > 0$  is the magnitude of the  
 157 noise entering the process. Intuitively, this SDE should be viewed as a rigorous formulation of the  
 158 informal model  $\dot{x}(t) = v(x(t)) + \text{“noise”}$ , with the Brownian term  $W(t)$  capturing all sources of noise,  
 159 randomness and uncertainty in the players' environment.<sup>2</sup> Consequently, to understand the impact of  
 160 uncertainty in each case of (GDA), we will examine the following quantities:

- 161 1. The distance  $\|X(t)\|_2^2$  of  $X(t)$  from the game's equilibrium (that is, the origin of  $\mathbb{R}^2$ ).
- 162 2. The time  $\tau_r = \inf\{t > 0 : \|X(t)\|_2 \leq r\}$  at which  $X(t)$  gets within  $r$  of the game's equilibrium.
- 163 3. The density  $\mathcal{P}(x, t)$  of  $X(t)$ —and, if it exists, its long-run limit  $\mathcal{P}_\infty(x) := \lim_{t \rightarrow \infty} \mathcal{P}(x, t)$ .

164 When it exists,  $\mathcal{P}_\infty$  is known as the *stationary*—or *invariant*—*distribution* of  $X$ , and it is closely  
 165 related to the *occupation measure*  $\mu_t$  of the process, defined here as

$$\mu_t(\mathcal{B}) = \frac{1}{t} \int_0^t \mathbb{1}\{X(s) \in \mathcal{B}\} ds \quad \text{for every Borel } \mathcal{B} \subseteq \mathcal{X}. \quad (7)$$

166 Under mild ergodicity conditions [26, Cor. 25.9], we have  $\lim_{t \rightarrow \infty} \mu_t(\mathcal{B}) = \int_{\mathcal{B}} \mathcal{P}_\infty$  so, concretely,  $\mathcal{P}_\infty$   
 167 measures the fraction of time that  $X(t)$  spends in a given subset of  $\mathcal{X}$  in the long run.

168 Taken together, these metrics provide a fairly complete picture of the statistics of  $X(t)$  so, in the rest  
 169 of this section, we analyze them in the context of (S-GDA) applied to the games (6a) and (6b).

<sup>2</sup>For a primer on SDEs, see [32, 50]; for completeness, we also present some basic elements in Appendix C.

170 **Case 1: Bilinear saddles.** In this case, by a direct application of Itô’s formula—the chain rule of  
 171 stochastic calculus [50, Chap. 4]—we readily obtain

$$d(\|X(t)\|_2^2) = 2X(t) \cdot dX(t) + dX(t) \cdot dX(t) = 2\sigma^2 dt + \sigma X(t) \cdot dW(t). \quad (8)$$

172 This suggests that, on average,  $\|X(t)\|_2^2$  increases as  $\Theta(\sigma^2 t)$ . Building on this observation, we show  
 173 in Appendix D that the dynamics (S-GDA) for the bilinear game (6a) enjoy the following properties:

174 **Proposition 1.** Suppose that (S-GDA) is run on the game (6a) with initial condition  $x_0 \in \mathbb{R}^2$ . Then:

- 175 1.  $\lim_{t \rightarrow \infty} \mathbb{E}_{x_0}[\|X(t)\|_2^2] = \infty$ , i.e.,  $X(t)$  escapes to infinity in mean square.
- 176 2.  $\mathbb{E}_{x_0}[\tau_r] = \infty$  if  $r < \|x_0\|$ , i.e.,  $X(t)$  takes infinite time on average to get closer to equilibrium.
- 177 3. The limit  $\mathcal{P}_\infty(x) = \lim_{t \rightarrow \infty} \mathcal{P}(x, t)$  does not exist, i.e.,  $X$  does not admit an invariant distribution.

178 Proposition 1 shows that, in the presence of uncertainty, the periodicity of the deterministic dynamics  
 179 (GDA) is completely destroyed. In fact, despite random fluctuations that occasionally bring  $X(t)$   
 180 closer to equilibrium, (S-GDA) exhibits a consistent drift away from equilibrium, escaping any  
 181 compact set in finite time and requiring infinite time to return. As a result,  $X(t)$  becomes infinitely  
 182 spread out in the long run, exhibiting no measurable concentration in any region of  $\mathbb{R}^2$ . For a partial  
 183 illustration of this behavior—which we view as antithetical to convergence—cf. Fig. 1. 

184 **Case 2: Quadratic saddles.** We now proceed to examine the behavior of (S-GDA) in the quadratic  
 185 min-max problem (6b), where (S-GDA) gives  $dX(t) = -X(t) dt + \sigma dW(t)$ . As is well known [32,  
 186 Chap. 7.4], this SDE describes the 2-dimensional Ornstein–Uhlenbeck (OU) process

$$X(t) = X(0)e^{-t} + \sigma \int_0^t e^{-(t-s)} dW(s). \quad (9)$$

187 Hence, by unfolding the stochastic integral in (9), we can draw the following conclusions for  $X(t)$ :

188 **Proposition 2.** Suppose that (S-GDA) is run on the game (6b) with initial condition  $x_0 \in \mathbb{R}^2$ . Then:

- 189 1.  $\lim_{t \rightarrow \infty} \mathbb{E}_{x_0}[\|X(t)\|_2^2] = \sigma^2$ , i.e., the dynamics fluctuate at mean distance  $\sigma$  from equilibrium.
- 190 2. The mean time required to get within distance  $r$  of the game’s equilibrium is bounded as

$$\mathbb{E}_{x_0}[\tau_r] \leq \frac{1}{2} \frac{\|x_0\|_2^2 - r^2}{r^2 - \sigma^2} \quad \text{for all } \sigma < r < \|x_0\|_2. \quad (10)$$

- 191 3. The density of  $X(t)$  is  $\mathcal{P}(x, t) = [\pi\sigma^2(1 - e^{-2t})]^{-1} \exp\left(-\frac{\|x - e^{-t}x_0\|_2^2}{(1 - e^{-2t})\sigma^2}\right)$ . In particular,  $X(t)$  con-  
 192 verges in distribution to a Gaussian random variable centered at 0, viz.

$$\mathcal{P}_\infty(x) \equiv \lim_{t \rightarrow \infty} \mathcal{P}(x, t) = 1/(\pi\sigma^2) \cdot e^{-\|x\|_2^2/\sigma^2}. \quad (11)$$

193 Proposition 2 shows that the geometric convergence properties of the deterministic dynamics (GDA)  
 194 are again destroyed in the presence of uncertainty. However, in stark contrast to Proposition 1 for  
 195 the bilinear case,  $X(t)$  now exhibits a consistent drift toward equilibrium, and it ends up being  
 196 sharply concentrated at a distance of  $\mathcal{O}(\sigma^2)$  from equilibrium. This interplay between recurrence  
 197 and concentration will play a crucial role in the sequel, and our aim in the rest of this section will be  
 198 to quantify the extent to which it holds in a more general setting.

199 **3.2. Learning in continuous time.** We now proceed to describe our general model for multi-agent  
 200 learning under uncertainty, hinging on the stochastic “follow-the-regularized-leader” template

$$dY_i(t) = v_i(X(t)) dt + dM_i(t) \quad X_i(t) = Q_i(Y_i(t)). \quad (\text{S-FTRL})$$

201 In the above, (i)  $Y_i(t) \in \mathcal{Y}_i$  is a “score” variable that tracks the aggregation of individual payoff  
 202 gradients in  $\mathcal{Y}_i$ ; (ii)  $M_i(t) \in \mathcal{Y}_i$  is a continuous square-integrable martingale acting as a catch-all,  
 203 “colored noise” disturbance term; and (iii)  $Q_i: \mathcal{Y}_i \rightarrow \mathcal{X}_i$  is the regularized mirror map of player  $i \in \mathcal{N}$ ,  
 204 as per (B.12). In this regard, (S-FTRL) represents a noisy “stimulus-response” mechanism, where  
 205 each player  $i \in \mathcal{N}$  tracks the aggregation of payoff gradients under uncertainty—the “stimulus”—and  
 206 “responds” to this aggregate via their individual regularized mirror map  $Q_i$ .



207 *Remark 1.* The terminology “follow-the-regularized-leader” is due to [55, 56], who first studied this  
 208 scheme in the context of online convex optimization in discrete time. This family of algorithms and  
 209 dynamics has been widely studied in the literature; we provide more details on this in [Appendix B](#).  $\clubsuit$

210 Moving forward, we will assume that the noise term  $M(t) = (M_i(t))_{i \in \mathcal{N}}$  in (S-FTRL) is of the form

$$dM(t) = \sigma(X(t)) \cdot dW(t) \quad \text{or, more explicitly} \quad dM_i(t) = \sigma_i(X(t)) \cdot dW(t) \quad (12)$$

211 where  $W(t) = (W_1(t), \dots, W_m(t))$  is a standard Brownian motion in  $\mathbb{R}^m$ , and  $\sigma(x) = (\sigma_i(x))_{i \in \mathcal{N}}$  is  
 212 an ensemble of state-dependent *diffusion matrices*  $\sigma_i: \mathcal{X}_i \rightarrow \mathbb{R}^{d_i \times m}$ ,  $i \in \mathcal{N}$ .<sup>3</sup> Importantly, the model  
 213 (12) allows for *correlated uncertainty* between different components of the process—e.g., accounting  
 214 for random disturbances on shared road segments in a congestion game—so it will be our base model  
 215 for the sequel. Our only standing assumption will be that  $\sigma: \mathcal{X} \rightarrow \mathbb{R}^{d \times m}$  is bounded and Lipschitz  
 216 continuous, which ensures that (S-FTRL) is *well-posed*, i.e., it admits a unique strong solution that  
 217 exists for all time for every initial condition  $Y(0) \leftarrow y \in \mathcal{Y}$  (cf. [Appendix C](#)).

218 *Remark 2.* To connect the above with [Section 3.1](#), note that (S-GDA) is recovered from (S-FTRL) by  
 219 taking  $\mathcal{X}_i = \mathbb{R}$ ,  $M_i(t) = \sigma W_i(t)$ , and  $h_i(x_i) = x_i^2/2$  for  $i = 1, 2$  (so  $Q_i(y_i) = y_i$  by [Example 1](#)).  $\clubsuit$

220 **3.3. Analysis and results.** We now proceed to describe our main results for the stochastic dynamics  
 221 (S-FTRL)—which, as we show shortly, reflect the dichotomy between bilinear and quadratic saddle-  
 222 point problems that we noted in [Section 3.1](#). To state them, it will be convenient to introduce a “primal-  
 223 dual” generalization of the Euclidean distance that is more closely aligned with the regularization  
 224 setup underlying the players’ response scheme. Deferring the details to [Appendix B](#), we define here  
 225 the *Fenchel coupling* induced by the regularizer  $h_i$  of player  $i \in \mathcal{N}$  as

$$F_i(p_i, y_i) = h_i(p_i) + h_i^*(y_i) - \langle y_i, x_i \rangle \quad \text{for all } i \in \mathcal{N}, \text{ and all } p_i \in \mathcal{X}_i, y_i \in \mathcal{Y}_i \quad (13)$$

226 where  $h_i^*(y_i) := \max_{x_i \in \mathcal{X}_i} \{\langle y_i, x_i \rangle - h_i(x_i)\}$  denotes the convex conjugate of  $h_i$ . For example, in  
 227 the unconstrained Euclidean case ([Example 1](#)), we recover the Euclidean distance squared, viz.  
 228  $F_i(p_i, y_i) = \frac{1}{2} \|Q_i(y_i) - p_i\|^2$ ; by comparison, under entropic regularization on the simplex ([Ex-  
 229 ample 2](#)), we get a “dualized” version of the Kullback–Leibler divergence, cf. [Appendix B](#). In all  
 230 cases,  $F_i$  is *positive-semidefinite* in the sense that  $F_i(p_i, y_i) \geq 0$  for all  $y_i \in \mathcal{Y}_i$ , with equality if and  
 231 only if  $Q_i(y_i) = p_i$ . In view of this, the total coupling  $F(x, y) := \sum_i F_i(p_i, y_i)$  is a valid measure of  
 232 “divergence” between  $p \in \mathcal{X}$  and  $y \in \mathcal{Y}$ , and we will use it freely in the sequel as such.

233 The last ingredient that we will need is two measures of the amount of randomness in (S-FTRL), viz.

$$\sigma_{\min}^2 := \min_{x \in \mathcal{X}} \lambda_{\min}(\Sigma(x)) \quad \text{and} \quad \sigma_{\max}^2 := \max_{x \in \mathcal{X}} \lambda_{\max}(\Sigma(x)) \quad (14)$$

234 where  $\Sigma \equiv \sigma \sigma^\top$  denotes the quadratic covariation matrix of the martingale  $M(t)$ , and  $\lambda_{\min}$  (resp.  $\lambda_{\max}$ )  
 235 denotes the minimum (resp. maximum) eigenvalue thereof.

236 With all this in hand, we will focus on two broad classes of games, *null-monotone* and *strongly  
 237 monotone*, of which the bilinear and quadratic examples of [Section 3.1](#) are archetypal examples. To  
 238 state our results, we will assume that (S-FTRL) is initialized at  $x_0 \leftarrow Q(y_0) \in \text{ri } \mathcal{X}$  for some  $y_0 \in \mathcal{Y}$ ,  
 239 and we will write  $F_t \equiv F(x^*, Y(t))$  where  $x^*$  is an equilibrium of the game. We then have:

240 **Theorem 1** (Null-monotone games). *Suppose that (S-FTRL) is run with a smooth mirror map  $Q$   
 241 in a null-monotone game  $\mathcal{G}$  that admits an interior equilibrium  $x^*$ , and consider the hitting times  
 242  $\tau_\varepsilon^- := \inf\{t > 0 : F_t \leq F_0 - \varepsilon\}$  and  $\tau_\varepsilon^+ := \inf\{t > 0 : F_t \geq F_0 + \varepsilon\}$ . If  $\sigma_{\min}^2 > 0$  and  $\varepsilon > 0$  is small  
 243 enough, then*

$$\mathbb{E}_{x_0}[\tau_\varepsilon^-] = \infty \quad \text{and} \quad \mathbb{E}_{x_0}[\tau_\varepsilon^+] \leq 2\varepsilon / (\kappa \sigma_{\min}^2) \quad (15)$$

244 *for some positive constant  $\kappa \equiv \kappa_\varepsilon > 0$ ; in addition,  $X(t)$  does not admit a limiting distribution.*

245 **Theorem 2** (Strongly monotone games). *Suppose that (S-FTRL) is run in an  $\alpha$ -strongly monotone  
 246 game  $\mathcal{G}$ , and consider the hitting time  $\tau_r := \inf\{t > 0 : X(t) \in \mathbb{B}_r(x^*)\}$  for a ball  $\mathbb{B}_r(x^*) = \{x :  
 247 \|x - x^*\| \leq r\}$  of radius  $r$  centered on the (necessarily unique) equilibrium  $x^*$  of  $\mathcal{G}$ . Then:*

$$\mathbb{E}_{x_0}[\tau_r] \leq (F_0/\alpha) / (r^2 - r_\sigma^2) \quad \text{for all } r > r_\sigma, \quad (16)$$

248 *where  $r_\sigma := \sigma_{\max}/\sqrt{2K\alpha}$ . If, in addition,  $\sigma_{\min} > 0$  and  $x^*$  is interior,  $X(t)$  admits an invariant  
 249 distribution concentrated in a ball of radius  $\mathcal{O}(\sigma_{\max})$  around  $x^*$ , and we have*

$$\lim_{t \rightarrow \infty} \mu_t(\mathbb{B}_r(x^*)) \geq 1 - r_\sigma^2/r^2 \quad \text{for all } r > r_\sigma. \quad (17)$$

<sup>3</sup>By the martingale representation theorem [50, Thm. 4.3.4], the loss in generality is negligible in our case.

Conceptually, [Theorems 1](#) and [2](#) reflect the dichotomy between the bilinear and quadratic examples studied in detail in [Section 3.1](#). Indeed, we see that:

1. In *null-monotone games*, the stochastic dynamics (**S-FTRL**) exhibit a consistent drift *away from equilibrium*, moving to greater distances in finite time, and requiring infinite time to return. As a result, if the game has an interior equilibrium,  $X(t)$  becomes infinitely spread out in the long run, exhibiting no concentration in *any* region of  $\mathcal{X}$  other than, **possibly**, its boundary (if  $\mathcal{X}$  is constrained).
2. In *strongly monotone games*, the dynamics drift *toward equilibrium*, and they end up being concentrated around the game’s (necessarily unique) equilibrium. However, the players’ learning trajectories continue to fluctuate at a distance which scales as  $\mathcal{O}(\sigma_{\max})$  and, with probability 1, they return arbitrarily close to where they started, infinitely often.

These properties paint a sharp separation between null- and strongly monotone games, with uncertainty carrying drastically different consequences in each case; for an illustration, see [Fig. 1](#).

The proof of [Theorems 1](#) and [2](#) is detailed in [Appendix D](#). From a technical standpoint, our analysis hinges on the use of the Fenchel coupling [\(13\)](#) as a “mean” energy function for the dynamics. In the null-monotone case, the hitting time estimates [\(15\)](#) rely on an application of Dynkin’s formula [\[50, Chap. 7.4\]](#), coupled with an eigenvalue estimation for the growth of  $F$ . Then, by descending to a specific quotient of  $\mathcal{Y}$  that compactifies the sublevel sets of  $F$ , we are able to leverage the fact that  $\mathbb{E}_{x_0}[\tau_r] = \infty$  for  $r < F_0$  to show that the dynamics are *not* positively recurrent—and hence, they *do not* admit an invariant distribution. The analysis for the strongly monotone case has the same starting point, but it then branches out almost immediately: the hitting time estimate [\(16\)](#) is again obtained via Dynkin’s stopping time formula, but positive recurrence can no longer be established in  $\mathcal{X}$ , because the infinitesimal generator of  $X(t)$  is not uniformly elliptic (that is, its eigenvalues are not bounded away from zero). Instead, we work directly with the infinitesimal generator of the score process  $Y(t)$  whose generator *is* uniformly elliptic after taking a specific quotient in  $\mathcal{Y}$ . This allows us to deduce positive recurrence in  $\mathcal{Y}$ , which we then push forward to  $\mathcal{X}$  via  $Q$ , and leverage the convergence of the occupation measures to the invariant distribution of the process to derive the concentration bound [\(17\)](#). We detail these steps in a series of technical lemmas in [Appendix D](#).

## 4 Learning under uncertainty in discrete time

We now turn to the discrete-time setting—our ultimate goal from the outset owing to its high practical and algorithmic relevance. A key point to keep in mind here is that the discrete-time analysis is significantly more intricate and difficult because of the absence of closed-form solutions and the inapplicability of diffusion-based techniques. Nevertheless, **as we shall see later in this section**, the structural insights gained from the continuous-time analysis of [Section 3](#) remain highly valuable in this context because they end up shaping the foundations of our tools and techniques.

**4.1. Learning in discrete time.** The most widely used algorithmic framework for multi-agent learning in games adheres again to the “follow-the-regularized-leader” template which unfolds over discrete time instances  $t = 0, 1, \dots$  as

$$Y_{i,t+1} = Y_{i,t} + \gamma \hat{v}_{i,t} \quad X_{i,t+1} = Q_i(Y_{i,t+1}). \quad (\text{FTRL})$$

In addition to the notions already introduced and discussed in [Section 3.2](#), (i)  $\hat{v}_{i,t}$  denotes here a stochastic estimate of the player’s payoff gradient vector at  $X_{i,t}$ ; and (ii)  $\gamma > 0$  is a *step-size* parameter, interchangeably referred to as the *learning rate* of the process. We discuss these new elements below.

**The feedback process.** In terms of feedback, we assume that, at each round  $t = 0, 1, \dots$ , each player receives stochastic gradient feedback of the form

$$\hat{v}_{i,t} = \mathbf{V}_i(X_t; \omega_t) \quad \text{or, aggregating over all players} \quad \hat{v}_t = \mathbf{V}(X_t; \omega_t) \quad (18)$$

where  $\hat{v}_t = (\hat{v}_{i,t})_{i \in \mathcal{N}}$  and  $\mathbf{V}(x; \omega) = (\mathbf{V}_i(x; \omega))_{i \in \mathcal{N}}$  is a *stochastic first-order oracle* of the form

$$\mathbf{V}(x; \omega) = v(x) + \mathbf{U}(x; \omega). \quad (\text{SFO})$$

In the above,  $\omega_t$ ,  $t = 0, 1, \dots$ , is an i.i.d. sequence of random seeds drawn from some complete probability space  $\Omega$ , and  $\mathbf{U}(x; \omega)$  is a random  $\mathcal{Y}$ -valued vector satisfying the standard assumptions

$$\mathbb{E}_\omega[\mathbf{U}(x; \omega)] = 0 \quad \text{and} \quad \mathbb{E}_\omega[\|\mathbf{U}(x; \omega)\|_*^2] \leq \sigma^2 \quad (19)$$

for some  $\sigma > 0$ . In this way, letting  $\mathcal{F}_t, t = 0, 1, \dots$ , denote the history of the process up to time  $t$ , and writing  $U_t := \mathbf{U}(X_t; \omega_t)$  for the noise in the players' gradient feedback at time  $t$ , we get

$$\hat{v}_t = v(X_t) + U_t \quad \text{with} \quad \mathbb{E}[U_t | \mathcal{F}_t] = 0 \quad \text{and} \quad \mathbb{E}[\|U_t\|_*^2 | \mathcal{F}_t] \leq \sigma^2. \quad (20)$$

Following standard practice in the field—see e.g., [59, 62] and references therein—we further assume that the probability distribution  $\nu_x$  of  $\mathbf{U}(x)$  decomposes as  $\nu_x = \nu_x^c + \nu_x^\perp$  where: (a)  $\nu_x^\perp$  is singular relative to the Lebesgue measure  $\lambda_{\mathcal{Y}}$  on  $\mathcal{Y}$ ; (b)  $\nu_x^c$  is absolutely continuous relative to  $\lambda_{\mathcal{Y}}$ ; and (c) the density  $p_x(y)$  of  $\nu_x^c$  is jointly continuous in  $x$  and  $y$ , and it satisfies  $\inf_{x \in \mathcal{X}} p_x(y) > 0$  for every compact set  $\mathcal{K} \subseteq \mathcal{X}$  and all  $y \in \mathcal{Y}$ . This last assumption is relatively mild and ensures that the noise retains a non-degenerate, smooth component across  $\mathcal{X}$ , much like the assumption  $\sigma_{\min} > 0$  for the diffusion matrix of (S-FTRL) in Section 3. This condition is trivially satisfied by most continuous error distributions in practice, and it can always be enforced by injecting a small uniform Gaussian noise component into the process, a technique which is widely used in both optimization and reinforcement learning to promote sufficient exploration and avoid degeneracy issues and saddle-points [6, 19, 35, 61]. In such cases, the density of the absolutely continuous component is strictly positive everywhere and independent of  $x \in \mathcal{X}$ , so the uniform lower bound condition holds trivially.

**The algorithm's learning rate.** The second feature which sets the discrete-time framework apart is the method's learning rate  $\gamma$ . Here and throughout, we consider a *constant* learning rate schedule; this should be contrasted to the stochastic approximation literature [6, 9, 33], where (FTRL) is run with a *vanishing* step-size  $\gamma_t \rightarrow 0$ , typically satisfying some form of the Robbins–Monro summability conditions  $\sum_t \gamma_t = \infty, \sum_t \gamma_t^2 < \infty$ . In many cases, the use of a vanishing step-size enables convergence of the algorithm because it dampens the impact of the noise over time [44]; at the same time however, this often comes at the price of slowing the algorithm down to a crawl over practical timescales. For this reason, we focus here exclusively on the constant step-size case, which is much more common in practice owing to its simplicity, robustness, and often superior empirical performance—but whose theoretical behavior remains far less understood.

**4.2. Analysis and results.** We now have the necessary groundwork in place to present our results for (FTRL). Before doing so, we should stress that the discrete-time analysis is, by necessity, more qualitative in nature than the more explicit, continuous-time results presented in Section 3. This gap is difficult to avoid: in continuous time, the rules of stochastic calculus comprise a very sharp set of tools with which to obtain closed-form estimates for the processes involved; by contrast, in discrete time, even the most basic tools of stochastic analysis—like Dynkin's formula—are dulled down because of measurability and subsampling issues.

As before, we split our focus between null- and strongly monotone games.

**The null-monotone regime.** A key take-away from the analysis of Section 3 is that, in null-monotone games, uncertainty causes the dynamics of regularized learning to spread out, diverging to infinity on average, without concentrating at any region of  $\mathcal{X}$  other than its boundary. Our first result below shows that a version of this tenet continues to hold in discrete time:

**Theorem 3** (Null-monotone games). *Suppose that (FTRL) is run in a null-monotone game  $\mathcal{G}$  with a strongly convex  $h^*$ , let  $x^*$  be an equilibrium of  $\mathcal{G}$ , and let  $F_t = F(x^*, Y_t)$ . Then  $\lim_{t \rightarrow \infty} \mathbb{E}[F_t] = \infty$ .*

This result shows that (FTRL) drifts away to infinity on average—though, of course, as in the continuous-time case, this does not mean that this occurs with probability 1. What is missing from Theorem 3 relative to Theorem 1 is a bound on the mean time required for  $F_t$  to increase or decrease by  $\varepsilon$ . In the absence of a *consistent* drift component, our continuous-time estimates were only made possible through the use of stochastic calculus; in discrete time however,  $X_t$  evolves in *discrete*, driftless jumps, introducing overshoots and upcrossings that render this question significantly harder. We conjecture that similar bounds do hold in discrete time, but we leave this open as a conjecture.

**The strongly monotone regime.** We now turn to the long-run behavior of (FTRL) in strongly monotone games. Based in no small part on the continuous-time analysis of the previous section, our goal will be to understand the distributional properties of the dynamics, with a particular focus on (a) the existence and uniqueness of an invariant measure; and (b) the extent to which this measure is concentrated around the game's equilibrium—which, in turn, quantifies the long-run proximity of the iterates of (FTRL) to equilibrium. With all this in mind, our results can be stated as follows:



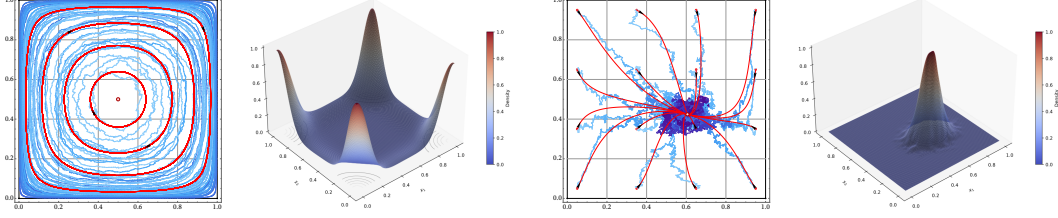

**Figure 1:** Trajectories and statistics of play under (FTRL) with entropic regularization in two min-max games over  $\mathcal{X} = [0, 1]^2$ , a bilinear and a quadratic one (left vs. right half respectively). Deterministic orbits are plotted in red and stochastic trajectories in shades of blue, with darker hues indicating later points in time; the density plots depict the resulting visitation frequency in  $\mathcal{X}$ . In tune with Theorems 3 and 4, we see that learning in null-monotone games drifts toward the *extremes* of  $\mathcal{X}$ ; by contrast, in strongly monotone games, learning orbits drift toward equilibrium, but continue to fluctuate around it. More details are provided in Appendix F.

**Theorem 4** (Strongly monotone games). Suppose that (FTRL) is run in an  $\alpha$ -strongly monotone game  $\mathcal{G}$ , let  $r_\sigma := \sqrt{\gamma(\sigma^2 + \beta^2)/(\alpha K)}$ , and consider the hitting time  $\tau_r := \inf\{t > 0 : X_t \in \mathbb{B}_r(x^*)\}$  for a ball  $\mathbb{B}_r(x^*) = \{x : \|x - x^*\| \leq r\}$  of radius  $r$  centered on the (necessarily unique) equilibrium  $x^*$  of  $\mathcal{G}$ . Then, for all  $r > r_\sigma$ , we have

$$\mathbb{E}[\tau_r] \leq \frac{1}{\alpha\gamma(r^2 - r_\sigma^2)} \times \begin{cases} F_0 & \text{if } X_0 \notin \mathbb{B}_r(x^*), \\ F_0 + \alpha\gamma r^2 & \text{if } X_0 \in \mathbb{B}_r(x^*), \end{cases} \quad (21)$$

where  $F_0 = F(x^*, Y_0)$ . If, in addition,  $x^*$  is interior,  $X_t$  admits a unique invariant distribution to which it converges in total variation, and we have

$$\lim_{t \rightarrow \infty} \frac{1}{t} \mathbb{E} \left[ \sum_{s=0}^t \mathbb{1}\{X_s \in \mathbb{B}_r(x^*)\} \right] \geq 1 - r_\sigma^2 / r^2 \quad (22)$$

for all  $r > r_\sigma$  such that  $\mathbb{B}_r(x^*) \subseteq \text{ri } \mathcal{X}$ .

**Remark.** Unlike the continuous-time setting of Section 3, we must treat the cases  $X_0 \in \mathbb{B}_r(x^*)$  and  $X_0 \notin \mathbb{B}_r(x^*)$  separately. This distinction arises only in discrete time, because the iterates may exhibit large jumps—so, returning to set  $\mathbb{B}_r(x^*)$  is not guaranteed, even if the process is initialized within. ☞

We prove Theorem 4 in Appendix E following the main steps outlined below. First, shadowing our continuous-time analysis, we reduce the dynamics to a suitable quotient space of  $\mathcal{Y}$ , eliminating redundant directions and ensuring that the process evolves in a minimal, non-degenerate domain. Building on this, we show that the induced dynamics are Lebesgue-irreducible, i.e., every measurable set with positive Lebesgue measure is reachable with positive probability under the transition kernel of the process. At the same time, invoking (21), we also deduce that  $\mathbb{P}(\tau_r < \infty) = 1$  for any initial condition, implying that  $\mathbb{B}_r(x^*)$  is visited infinitely often. In a similar vein, we also show that  $\mathbb{B}_r(x^*)$  satisfies a minorization condition, meaning that the transition kernel from any point in the ball dominates a fixed reference measure. This implies that, upon returning to  $\mathbb{B}_r(x^*)$ , the process has a nonzero chance of “forgetting” its past, allowing us to construct a regeneration structure via a coupling argument. Finally, leveraging the continuity of  $F(x^*, y)$ , we obtain a uniform bound on the expected return times  $\mathbb{E}[\tau_r]$  over any initialization in  $\mathbb{B}_r(x^*)$ , which allows us to conclude that the process  $Y_t$  is positive Harris recurrent. As a result, the iterates converge to a unique invariant measure, and we obtain quantitative control over their long-run concentration by means of our previous estimates.

## 5 Concluding remarks

Our aim in this paper was to quantify the impact of noise and uncertainty on the dynamics of multi-agent regularized learning. Our findings reveal a sharp separation between games that are *null-monotone* (like bilinear min-max games), and *strongly monotone* games (like Kelly auctions or Cournot competitions). In the former case, the quasi-periodic profile of the deterministic dynamics is destroyed, and learning under uncertainty drifts away on average toward extreme points (or escapes to infinity); in the latter, the sharp convergence guarantees of the deterministic dynamics are diluted by noise, and the resulting dynamics end up concentrated in a region around the game’s equilibrium (which we estimate). This paves the way for further explorations of the long-run statistics of regularized learning in games—especially pertaining to the invariant measure of the process—a topic which we find particularly promising for advancing our understanding of the field.

## References

- [1] Abernethy, J., Lee, C., and Tewari, A. Fighting bandits with a new kind of smoothness. In *NIPS '15: Proceedings of the 29th International Conference on Neural Information Processing Systems*, 2015.
- [2] Audibert, J.-Y., Bubeck, S., and Lugosi, G. Minimax policies for combinatorial prediction games. In *COLT '11: Proceedings of the 24th Annual Conference on Learning Theory*, 2011.
- [3] Auer, P., Cesa-Bianchi, N., Freund, Y., and Schapire, R. E. Gambling in a rigged casino: The adversarial multi-armed bandit problem. In *Proceedings of the 36th Annual Symposium on Foundations of Computer Science*, 1995.
- [4] Auer, P., Cesa-Bianchi, N., Freund, Y., and Schapire, R. E. The nonstochastic multiarmed bandit problem. *SIAM Journal on Computing*, 32(1):48–77, 2002.
- [5] Belmega, E. V., Lasaulce, S., and Debbah, M. Power allocation games for MIMO multiple access channels with coordination. *IEEE Trans. Wireless Commun.*, 8(5):3182–3192, June 2009.
- [6] Benaïm, M. Dynamics of stochastic approximation algorithms. In Azéma, J., Émery, M., Ledoux, M., and Yor, M. (eds.), *Séminaire de Probabilités XXXIII*, volume 1709 of *Lecture Notes in Mathematics*, pp. 1–68. Springer Berlin Heidelberg, 1999.
- [7] Bertsekas, D. P. *Convex optimization algorithms*. Athena Scientific, 2015.
- [8] Bhattacharya, R. N. Criteria for recurrence and existence of invariant measures for multidimensional diffusions. *The Annals of Probability*, 6:541–553, 1978.
- [9] Borkar, V. S. *Stochastic Approximation: A Dynamical Systems Viewpoint*. Cambridge University Press and Hindustan Book Agency, 2008.
- [10] Bravo, M. and Mertikopoulos, P. On the robustness of learning in games with stochastically perturbed payoff observations. *Games and Economic Behavior*, 103(John Nash Memorial issue):41–66, May 2017.
- [11] Cabrales, A. Stochastic replicator dynamics. *International Economic Review*, 41(2):451–81, May 2000.
- [12] Cesa-Bianchi, N. and Lugosi, G. *Prediction, Learning, and Games*. Cambridge University Press, 2006.
- [13] Chen, G. and Teboulle, M. Convergence analysis of a proximal-like minimization algorithm using Bregman functions. *SIAM Journal on Optimization*, 3(3):538–543, August 1993.
- [14] Douc, R., Moulines, E., Priouret, P., and Soulier, P. *Markov chains*. Operation research and financial engineering. Springer, 2018. doi: 10.1007/978-3-319-97704-1. URL <https://hal.science/hal-02022651>.
- [15] Engel, M. and Piliouras, G. A stochastic variant of replicator dynamics in zero-sum games and its invariant measures. *Physica D: Nonlinear Phenomena*, 456:133940, December 2023.
- [16] Folland, G. B. *Real Analysis*. Wiley-Interscience, 2 edition, 1999.
- [17] Foster, D. and Young, H. P. Stochastic evolutionary game dynamics. *Theoretical Population Biology*, 38: 219–232, 1990.
- [18] Fudenberg, D. and Harris, C. Evolutionary dynamics with aggregate shocks. *Journal of Economic Theory*, 57(2):420–441, August 1992.
- [19] Ge, R., Huang, F., Jin, C., and Yuan, Y. Escaping from saddle points – Online stochastic gradient for tensor decomposition. In *COLT '15: Proceedings of the 28th Annual Conference on Learning Theory*, 2015.
- [20] Hernández-Lerma, O. and Lasserre, J.-B. *Markov Chains and Invariant Probabilities*. Birkhäuser Basel, 2003. doi: 10.1007/978-3-0348-8024-4.
- [21] Hiriart-Urruty, J.-B. and Lemaréchal, C. *Fundamentals of Convex Analysis*. Springer, Berlin, 2001.
- [22] Hofbauer, J. and Imhof, L. A. Time averages, recurrence and transience in the stochastic replicator dynamics. *The Annals of Applied Probability*, 19(4):1347–1368, 2009.
- [23] Huang, K. and Zhang, S. New first-order algorithms for stochastic variational inequalities. *SIAM Journal on Optimization*, 32(4):2745–2772, 2022.
- [24] Imhof, L. A. The long-run behavior of the stochastic replicator dynamics. *The Annals of Applied Probability*, 15(1B):1019–1045, 2005.
- [25] Itô, K. Stochastic integral. *Proceedings of the Imperial Academy of Tokyo*, 20:519–524, 1944.
- [26] Kallenberg, O. *Foundations of modern probability*. Probability and its Applications (New York). Springer-Verlag, New York, 2002. ISBN 0-387-95313-2.
- [27] Karatzas, I. and Shreve, S. E. *Brownian Motion and Stochastic Calculus*. Springer-Verlag, Berlin, 1998.
- [28] Khasminskii, R. Z. *Stochastic Stability of Differential Equations*. Number 66 in Stochastic Modelling and Applied Probability. Springer-Verlag, Berlin, 2 edition, 2012.
- [29] Krichene, W. *Continuous and discrete dynamics for online learning and convex optimization*. PhD thesis, Department of Electrical Engineering and Computer Sciences, University of California, Berkeley, 2016.
- [30] Krichene, W. and Bartlett, P. Acceleration and averaging in stochastic descent dynamics. In *NIPS '17: Proceedings of the 31st International Conference on Neural Information Processing Systems*, 2017.

- [31] Krichene, W., Drighès, B., and Bayen, A. M. Online learning of Nash equilibria in congestion games. *SIAM Journal on Control and Optimization*, 53(2):1056–1081, 2015.
- [32] Kuo, H.-H. *Introduction to Stochastic Integration*. Springer, Berlin, 2006.
- [33] Kushner, H. J. and Clark, D. S. *Stochastic Approximation Methods for Constrained and Unconstrained Systems*. Springer, 1978.
- [34] Lattimore, T. and Szepesvári, C. *Bandit Algorithms*. Cambridge University Press, Cambridge, UK, 2020.
- [35] Lillicrap, T. P., Hunt, J. J., Pritzel, A., Heess, N., Erez, T., Tassa, Y., Silver, D., and Wierstra, D. Continuous control with deep reinforcement learning. In *4th International Conference on Learning Representations, ICLR 2016, San Juan, Puerto Rico, May 2-4, 2016, Conference Track Proceedings*, 2016.
- [36] Littlestone, N. and Warmuth, M. K. The weighted majority algorithm. *Information and Computation*, 108(2):212–261, 1994.
- [37] Loizou, N., Berard, H., Gidel, G., Mitliagkas, I., and Lacoste-Julien, S. Stochastic gradient descent-ascent and consensus optimization for smooth games: Convergence analysis under expected co-coercivity. In *NeurIPS '21: Proceedings of the 35th International Conference on Neural Information Processing Systems*, 2021.
- [38] McKelvey, R. D. and Palfrey, T. R. Quantal response equilibria for normal form games. *Games and Economic Behavior*, 10(6):6–38, 1995.
- [39] Mertikopoulos, P. and Moustakas, A. L. The emergence of rational behavior in the presence of stochastic perturbations. *The Annals of Applied Probability*, 20(4):1359–1388, July 2010.
- [40] Mertikopoulos, P. and Sandholm, W. H. Learning in games via reinforcement and regularization. *Mathematics of Operations Research*, 41(4):1297–1324, November 2016.
- [41] Mertikopoulos, P. and Staudigl, M. Convergence to Nash equilibrium in continuous games with noisy first-order feedback. In *CDC '17: Proceedings of the 56th IEEE Annual Conference on Decision and Control*, 2017.
- [42] Mertikopoulos, P. and Staudigl, M. On the convergence of gradient-like flows with noisy gradient input. *SIAM Journal on Optimization*, 28(1):163–197, January 2018.
- [43] Mertikopoulos, P. and Staudigl, M. Stochastic mirror descent dynamics and their convergence in monotone variational inequalities. *Journal of Optimization Theory and Applications*, 179(3):838–867, December 2018.
- [44] Mertikopoulos, P. and Zhou, Z. Learning in games with continuous action sets and unknown payoff functions. *Mathematical Programming*, 173(1-2):465–507, January 2019.
- [45] Mertikopoulos, P., Papadimitriou, C. H., and Piliouras, G. Cycles in adversarial regularized learning. In *SODA '18: Proceedings of the 29th annual ACM-SIAM Symposium on Discrete Algorithms*, 2018.
- [46] Mertikopoulos, P., Hsieh, Y.-P., and Cevher, V. A unified stochastic approximation framework for learning in games. *Mathematical Programming*, 203:559–609, January 2024.
- [47] Meyn, S., Tweedie, R. L., and Glynn, P. W. *Markov Chains and Stochastic Stability*. Cambridge Mathematical Library. Cambridge University Press, 2 edition, 2009.
- [48] Michel, D. and Pardoux, É. An introduction to Malliavin calculus and some of its applications. In *Recent advances in stochastic calculus*, pp. 65–104. Springer, 1990.
- [49] Nesterov, Y. Primal-dual subgradient methods for convex problems. *Mathematical Programming*, 120(1): 221–259, 2009.
- [50] Øksendal, B. *Stochastic Differential Equations*. Springer-Verlag, Berlin, 6 edition, 2013.
- [51] Piliouras, G. and Shamma, J. S. Optimization despite chaos: Convex relaxations to complex limit sets via Poincaré recurrence. In *SODA '14: Proceedings of the 25th annual ACM-SIAM Symposium on Discrete Algorithms*, 2014.
- [52] Rockafellar, R. T. *Convex Analysis*. Princeton University Press, Princeton, NJ, 1970.
- [53] Rockafellar, R. T. and Wets, R. J. B. *Variational Analysis*, volume 317 of *A Series of Comprehensive Studies in Mathematics*. Springer-Verlag, Berlin, 1998.
- [54] Rosen, J. B. Existence and uniqueness of equilibrium points for concave  $N$ -person games. *Econometrica*, 33(3):520–534, 1965.
- [55] Shalev-Shwartz, S. Online learning and online convex optimization. *Foundations and Trends in Machine Learning*, 4(2):107–194, 2011.
- [56] Shalev-Shwartz, S. and Singer, Y. Convex repeated games and Fenchel duality. In *NIPS' 06: Proceedings of the 19th Annual Conference on Neural Information Processing Systems*, pp. 1265–1272. MIT Press, 2006.
- [57] Telatar, I. E. Capacity of multi-antenna Gaussian channels. *European Transactions on Telecommunications and Related Technologies*, 10(6):585–596, 1999.

- 496 [58] van Damme, E. *Stability and perfection of Nash equilibria*. Springer-Verlag, Berlin, 1987.
- 497 [59] Vlatakis, E. V., Giannou, A., Chen, Y., and Xie, Q. Stochastic methods in variational inequalities:  
498 Ergodicity, bias and refinements. In *Proceedings of The 27th International Conference on Artificial*  
499 *Intelligence and Statistics*, volume 238 of *Proceedings of Machine Learning Research*, pp. 4123–4131.  
500 PMLR, 02–04 May 2024.
- 501 [60] Vovk, V. G. Aggregating strategies. In *COLT '90: Proceedings of the 3rd Workshop on Computational*  
502 *Learning Theory*, pp. 371–383, 1990.
- 503 [61] Welling, M. and Teh, Y. W. Bayesian learning via stochastic gradient langevin dynamics. In *Proceedings*  
504 *of the 28th International Conference on International Conference on Machine Learning*, ICML'11, pp.  
505 681–688, 2011.
- 506 [62] Yu, L., Balasubramanian, K., Volgushev, S., and Erdogdu, M. A. An analysis of constant step size sgd in  
507 the non-convex regime: asymptotic normality and bias. NIPS '21, Red Hook, NY, USA, 2021. Curran  
508 Associates Inc. ISBN 9781713845393.
- 509 [63] Yu, W., Rhee, W., Boyd, S. P., and Cioffi, J. M. Iterative water-filling for Gaussian vector multiple-access  
510 channels. *IEEE Trans. Inf. Theory*, 50(1):145–152, 2004.
- 511 [64] Zimmert, J. and Seldin, Y. Tsallis-INF: An optimal algorithm for stochastic and adversarial bandits.  
512 *Journal of Machine Learning Research*, 22(28):1–49, 2021.
- 513 [65] Zinkevich, M. Online convex programming and generalized infinitesimal gradient ascent. In *ICML '03:*  
514 *Proceedings of the 20th International Conference on Machine Learning*, pp. 928–936, 2003.

## A Examples

In this appendix, we provide a series of examples of games adhering to our basic assumptions regarding concavity and monotonicity.

**Example A.1** (Zero-sum bimatrix games). A bimatrix game consists of two players, each with a finite set of actions  $\mathcal{A}_i, i = 1, 2$ , and a min-max objective function  $L: \mathcal{A}_1 \times \mathcal{A}_2 \rightarrow \mathbb{R}$ , typically encoded in a matrix  $M \in \mathbb{R}^{\mathcal{A}_1 \times \mathcal{A}_2}$  with  $M_{\alpha\beta} = L(\alpha, \beta)$  for all  $\alpha \in \mathcal{A}_1, \beta \in \mathcal{A}_2$ . The first player is cast in the role of the minimizer and the second player in that of the maximizer, so their corresponding payoff functions are defined as  $u_1 = -L = -u_2$ .

In the mixed extension of the game, each player can mix their actions by selecting a probability distribution—a *mixed strategy*—over  $\mathcal{A}_i$ , that is, an element  $x_i$  of the probability simplex  $\mathcal{X}_i \equiv \Delta(\mathcal{A}_i) = \{x_i \in \mathbb{R}_+^{\mathcal{A}_i} : \|x_i\|_1 = 1\}$ . Accordingly, in matrix notation, the players' corresponding mixed payoffs are given by

$$u_1(x_1, x_2) = -x_1^\top M x_2 = -u_2(x_1, x_2) \quad (\text{A.1})$$

so their individual gradient fields can be expressed as

$$v_1(x_1, x_2) = -M x_2 \quad \text{and} \quad v_2(x_1, x_2) = M^\top x_1 \quad (\text{A.2})$$

for all  $x_1 \in \mathcal{X}_1$  and all  $x_2 \in \mathcal{X}_2$ .

By definition, a mixed-strategy Nash equilibrium of a bimatrix zero-sum game satisfies

$$L(x_1^*, x_2) \leq L(x_1^*, x_2^*) \leq L(x_1, x_2^*) \quad \text{for all } x_1 \in \mathcal{X}_1, x_2 \in \mathcal{X}_2. \quad (\text{A.3})$$

If, in addition,  $x_1^*, x_2^*$  both have full support—that is,  $x_1^* \in \text{ri } \mathcal{X}_1$  and  $x_2^* \in \text{ri } \mathcal{X}_2$ —we also have the “equalizing payoffs” condition

$$L(x_1^*, x_2) = L(x_1, x_2^*) \quad \text{for all } x_1 \in \mathcal{X}_1, x_2 \in \mathcal{X}_2 \quad (\text{A.4})$$

which means that (A.3) binds identically. In this case, we readily get

$$\begin{aligned} \langle v_1(x_1, x_2), x_1 - x_1^* \rangle + \langle v_2(x_1, x_2), x_2 - x_2^* \rangle \\ = u_1(x_1, x_2) - u_1(x_1^*, x_2) + u_2(x_1, x_2) - u_2(x_1, x_2^*) = 0 \end{aligned} \quad (\text{A.5})$$

for all  $x_1 \in \mathcal{X}_1, x_2 \in \mathcal{X}_2$ , i.e., the game is null-monotone in the sense of Definition 1.  $\heartsuit$

**Example A.2** (Cournot competition). In the standard Cournot competition model, there is a finite set of *firms*, indexed by  $i \in \mathcal{N} = \{1, \dots, N\}$ , each providing the market with a quantity  $x_i \in [0, B_i]$  of some good (or service) up to the firm's production budget  $B_i$ . Following the law of supply and demand, this good is priced following the simple linear model  $P(x) = a - b \sum_i x_i$ , i.e., as a linearly decreasing function of the total supply. Accordingly, in this model, the utility of firm  $i$  is given by

$$u_i(x) = x_i P(x) - c_i x_i = \left[ a - b \sum_{j \in \mathcal{N}} x_j - c_i \right] x_i, \quad (\text{A.6})$$

where  $c_i$  represents the marginal production cost of firm  $i$ .

By a straightforward derivation, the players' individual payoff gradients are given by

$$v_i(x) = \frac{\partial u_i}{\partial x_i} = \left[ a - b \sum_{j \in \mathcal{N}} x_j - c_i \right] - b x_i \quad (\text{A.7})$$

and hence, the Hessian matrix of the game will be

$$H_{ij}(x) := \frac{1}{2} \frac{\partial^2 u_i}{\partial x_j \partial x_i} + \frac{1}{2} \frac{\partial^2 u_j}{\partial x_i \partial x_j} = -b - b \delta_{ij} \quad (\text{A.8})$$

where  $\delta_{ij}$  is the standard Kronecker delta. Since  $H$  is circulant, standard linear algebra considerations show that its eigenvalues are  $-b$  and  $-(N+1)b$  (with multiplicity  $N-1$  and 1 respectively), so it follows by a well-known second-order criterion that the Cournot competition game is  $b$ -strongly monotone [44, 54].  $\heartsuit$



546 **Example A.3** (Signal covariance optimization). Consider a vector Gaussian channel of the form

$$\mathbf{y} = \sum_{i \in \mathcal{N}} \mathbf{H}_i \mathbf{x}_i + \mathbf{z} \quad (\text{A.9})$$

547 where  $\mathbf{x}_i \in \mathbb{C}^{m_i}$  is the (complex-valued) signal transmitted by the  $i$ -th user of the channel,  $\mathbf{H} \in \mathbb{C}^{n \times m_i}$   
 548 is the transfer matrix of the channel,  $\mathbf{z} \in \mathbb{C}^n$  is the noise in the channel (assumed zero-mean Gaussian  
 549 and, without loss of generality, with unit covariance), and  $\mathbf{y} \in \mathbb{C}^n$  is the aggregate signal output of the  
 550 channel [63]. In this context, each user  $i \in \mathcal{N}$  controls the covariance matrix  $\mathbf{X}_i = \mathbb{E}[\mathbf{x}_i \mathbf{x}_i^\dagger]$  subject to  
 551 the power constraint  $\text{tr}(\mathbf{X}_i) = \mathbb{E}[\|\mathbf{x}_i\|^2] \leq P_i$ , where  $P_i$  denotes the user's maximum transmit power.  
 552 In this case, by the celebrated Shannon–Telatar formula [57], and assuming a single-user decoding  
 553 scheme at the receiver, the achievable rate of the  $i$ -th user is

$$u_i(\mathbf{X}_i; \mathbf{X}_{-i}) = \log \det \left( \mathbf{I} + \sum_j \mathbf{H}_j \mathbf{X}_j \mathbf{H}_j^\dagger \right) - \log \det \left( \mathbf{I} + \sum_{j \neq i} \mathbf{H}_j \mathbf{X}_j \mathbf{H}_j^\dagger \right). \quad (\text{A.10})$$

554 Putting everything together, this defines a continuous game with players  $i \in \mathcal{N} = \{1, \dots, N\}$ ,  
 555 spectrahedral action sets of the form

$$\mathcal{Q}_i = \{\mathbf{X}_i \in \mathbb{C}^{m_i \times m_i} : \mathbf{X}_i \succcurlyeq 0 \text{ and } \text{tr} \mathbf{X}_i \leq P_i\} \quad (\text{A.11})$$

556 for all  $i \in \mathcal{N}$ , and payoff functions given by (A.10). By a calculation of Belmega et al. [5], it is  
 557 known that this game is concave and monotone—and, in fact, *strongly monotone* if the linear mapping  
 558  $(\mathbf{X}_1, \dots, \mathbf{X}_N) \mapsto \sum_i \mathbf{H}_i \mathbf{X}_i \mathbf{H}_i^\dagger$  is not rank-deficient.  $\square$

## 559 B Mirror maps and regularization

560 In this appendix, we collect some background material, properties and examples regarding the  
 561 regularization machinery underlying (FTRL) and (S-FTRL). To lighten notation—especially with  
 562 respect to the player index  $i \in \mathcal{N}$ —we base everything in this appendix on an abstract closed convex  
 563 subset of some  $d$ -dimensional vector space, which could either be  $\mathcal{X}_i$  or  $\mathcal{X}$ , depending on the context.

564 The results presented below (or a version thereof) are known in the literature; nevertheless, we  
 565 provide detailed proofs for completeness and to resolve any conflicts or ambiguities with different  
 566 conventions in the literature.

567 **B.1. Preliminaries.** Let  $\mathcal{V}$  be a  $d$ -dimensional normed space, let  $\mathcal{Y} := \mathcal{V}^*$  denote the (algebraic) dual  
 568 of  $\mathcal{V}$ , and let  $\langle y, x \rangle$  denote the canonical bilinear pairing between  $x \in \mathcal{V}$  and  $y \in \mathcal{Y}$ . If  $\|\cdot\|$  is a norm  
 569 on  $\mathcal{V}$  will also write

$$\|y\|_* = \max\{\langle y, x \rangle : \|x\| \leq 1\} \quad (\text{B.1})$$

570 for the induced dual norm on  $\mathcal{Y}$ , so  $|\langle y, x \rangle| \leq \|x\| \|y\|_*$  for all  $x \in \mathcal{V}$  and all  $y \in \mathcal{Y}$  by construction.

571 Given a closed convex subset  $\mathcal{C}$  of  $\mathcal{V}$ , we also define:

- 572 1. The *tangent cone* to  $\mathcal{C}$  at  $p \in \mathcal{C}$  as

$$\text{TC}(p) = \text{cl}\{z \in \mathcal{V} : p + tz \in \mathcal{C} \text{ for some } t > 0\} \quad (\text{B.2})$$

i.e., as the closure of the set of rays emanating from  $p$  and meeting  $\mathcal{C}$  in at least one other point.

- 573 2. The *dual cone* to  $\mathcal{C}$  at  $p \in \mathcal{C}$  as

$$\text{TC}^*(p) = \{w \in \mathcal{Y} : \langle w, z \rangle \geq 0 \text{ for all } z \in \text{TC}(p)\} \quad (\text{B.3})$$

- 574 3. The *polar cone* to  $\mathcal{C}$  at  $p \in \mathcal{C}$  as

$$\text{PC}(p) = \{w \in \mathcal{Y} : \langle w, z \rangle \leq 0 \text{ for all } z \in \text{TC}(p)\} \quad (\text{B.4})$$

575 Following standard conventions in the field [52], convex functions will be allowed to take values  
 576 in the extended real line  $\mathbb{R} \cup \{\infty\}$ , and we will denote the *effective domain* of a convex function  
 577  $f: \mathcal{V} \rightarrow \mathbb{R} \cup \{\infty\}$  as

$$\text{dom } f := \{x \in \mathcal{V} : f(x) < \infty\}. \quad (\text{B.5})$$

578 When there is no danger of confusion, we will identify a convex function  $f: \mathcal{V} \rightarrow \mathbb{R}$  with its  
 579 restriction on  $\text{dom } f$ ; in other words, we will treat  $f$  interchangeably as a function on  $\text{dom } f$  with  
 580 values in  $\mathbb{R}$ , or as a function on  $\mathcal{V}$  with values in  $\mathbb{R} \cup \{\infty\}$  (and finite on  $\text{dom } f$ ).

Throughout the sequel, we will assume that all functions under study are *proper*, that is,  $\text{dom } f \neq \emptyset$ . Then, given a proper function  $f: \mathcal{V} \rightarrow \mathbb{R} \cup \{\infty\}$ , the *subdifferential* of  $f$  at  $x \in \text{dom } f$  is defined as

$$\partial f(x) := \{y \in \mathcal{V} : f(x') \geq f(x) + \langle y, x' - x \rangle \text{ for all } x' \in \mathcal{V}\} \quad (\text{B.6})$$

and we denote the *domain of subdifferentiability* of  $f$  as

$$\text{dom } \partial f = \{x \in \mathcal{V} : \partial f(x) \neq \emptyset\}. \quad (\text{B.7})$$

With all this in hand, a *regularizer* on a closed convex subset  $\mathcal{C}$  of  $\mathcal{V}$  is a continuous function  $h: \mathcal{C} \rightarrow \mathbb{R}$  which is *strongly convex*, i.e., there exists some  $K > 0$  such that

$$h(\lambda x + (1 - \lambda)x') \leq \lambda h(x) + (1 - \lambda)h(x') - \frac{K}{2}\lambda(1 - \lambda)\|x' - x\|^2 \quad (\text{B.8})$$

for all  $x, x' \in \mathcal{C}$  and for all  $\lambda \in [0, 1]$ . By standard arguments [7, 53], this immediately implies that

$$h(x') \geq h(x) + \partial h(x; x' - x) + \frac{K}{2}\|x' - x\|^2 \quad \text{for all } x, x' \in \mathcal{X}, \quad (\text{B.9})$$

where

$$\partial h(x; x' - x) = \lim_{\theta \rightarrow 0^+} [h(x + \theta(x' - x)) - h(x)]/\theta \quad (\text{B.10})$$

denotes the one-sided directional derivative of  $h$  at  $x$  along the direction of  $x' - x$ . In addition, we also define the following objects associated to  $h$ :

1. The *prox-domain* of  $h$ :

$$\mathcal{C}_h := \text{dom } \partial h \quad (\text{B.11})$$

2. The *mirror map*  $Q: \mathcal{V} \rightarrow \mathcal{X}$  induced by  $h$ :

$$Q(y) := \arg \max_{x \in \mathcal{X}} \{\langle y, x \rangle - h(x)\} \quad \text{for all } y \in \mathcal{Y}. \quad (\text{B.12})$$

3. The *convex conjugate*  $h^*: \mathcal{V} \rightarrow \mathbb{R}$  of  $h$ :

$$h^*(y) := \max_{x \in \mathcal{X}} \{\langle y, x \rangle - h(x)\} \quad \text{for all } y \in \mathcal{Y}. \quad (\text{B.13})$$

The proposition below provides some basic properties linking all the above:

**Proposition B.1.** *Let  $h$  be a  $K$ -strongly convex regularizer on  $\mathcal{C}$ . Then:*

(a)  $Q$  is single-valued on  $\mathcal{Y}$ .

(b) For all  $x \in \mathcal{C}_h$  and all  $y \in \mathcal{Y}$ , we have

$$x = Q(y) \quad \text{if and only if} \quad y \in \partial h(x). \quad (\text{B.14})$$

(c) The image  $\text{im } Q$  of  $Q$  is equal to the prox-domain of  $h$ , and we have

$$\text{ri } \mathcal{C} \subseteq \text{im } Q = \mathcal{C}_h \subseteq \mathcal{C}. \quad (\text{B.15})$$

(d) The convex conjugate  $h^*: \mathcal{V} \rightarrow \mathbb{R}$  of  $h$  is differentiable and satisfies

$$Q(y) = \nabla h^*(y) \quad \text{for all } y \in \mathcal{Y}. \quad (\text{B.16})$$

(e)  $Q$  is  $(1/K)$ -Lipschitz continuous, that is,

$$\|Q(y') - Q(y)\| \leq (1/K)\|y' - y\|_* \quad \text{for all } y, y' \in \mathcal{Y}. \quad (\text{B.17})$$

(f) Fix some  $y \in \mathcal{Y}$  and let  $x = Q(y)$ . Then, for all  $x' \in \mathcal{X}$  we have:

$$\partial h(x; x' - x) \geq \langle y, x' - x \rangle. \quad (\text{B.18})$$

(g) Fix some  $y \in \mathcal{Y}$ , and let  $x = Q(y)$ . Then  $Q(y + w) = x$  for all  $w \in \text{PC}(x)$ .

602 *Proof.* For the most part, these properties are well known in the literature (except possibly the last  
603 one), so we only provide a pointer or a short sketch for most of them.

604 (a) This readily follows from the fact that  $h$  is strongly convex, so the arg max in (B.12) is attained  
605 and is unique for all  $y \in \mathcal{Y}$ .

606 (b) By Fermat's rule [52, Chap. 26], we readily see that  $x$  solves (B.12) if and only if  $y - \partial h(x) \ni 0$ ,  
607 that is, if and only if  $y \in \partial h(x)$ . Since this implies that  $\partial h$ , our claim follows.

608 (c) By (B.14), we readily get  $\text{im } Q = C_h$ . As for the second part of our claim, it follows from basic  
609 properties of the subdifferential, cf. Rockafellar [52, Chap. 26].

610 (d) This is simply Danskin's theorem, see e.g., Bertsekas [7, Proposition 5.4.8, Appendix B].

611 (e) This is a consequence of the fact that  $h^*$  is  $(1/K)$ -Lipschitz smooth, cf. Rockafellar & Wets [53,  
612 Theorem 12.60(b)].

613 (f) Since  $y \in \partial h(x)$  by (B.14), we readily get that

$$h(x + \theta(x' - x)) \geq h(x) + \theta \langle y, x' - x \rangle \quad \text{for all } \theta \in [0, 1]. \quad (\text{B.19})$$

614 Hence, by rearranging and taking the limit  $\theta \rightarrow 0^+$ , we conclude that

$$\partial h(x; x' - x) = \lim_{\theta \rightarrow 0^+} \frac{h(x + \theta(x' - x)) - h(x)}{\theta} \geq \langle y, x' - x \rangle \quad (\text{B.20})$$

615 as claimed.<sup>4</sup>

616 (g) By (B.14) it suffices to show that  $y + w \in \partial h(x)$  for all  $w \in \text{PC}(x)$ . However, if  $w \in \text{PC}(x)$ , we  
617 also have  $\langle w, x' - x \rangle \leq 0$  for all  $x' \in \mathcal{X}$ , and hence, with  $y \in \partial h(x)$ , we readily get

$$\begin{aligned} h(x') &\geq h(x) + \langle y, x' - x \rangle \\ &\geq h(x) + \langle y + w, x' - x \rangle \quad \text{for all } x' \in \mathcal{X}. \end{aligned} \quad (\text{B.21})$$

618 This shows that  $y + w \in \partial h(x)$  and completes our proof. ■

619 Following [40, 44], we also define the *Fenchel coupling* associated to  $h$  as

$$F(p, y) = h(p) + h^*(y) - \langle y, p \rangle \quad \text{for all } p \in \mathcal{X}, y \in \mathcal{Y}. \quad (\text{B.22})$$

620 The next proposition shows that the Fenchel coupling can be seen as a “primal-dual” measure of  
621 divergence between  $p \in \mathcal{C}$  and  $y \in \mathcal{Y}$ :

622 **Proposition B.2.** *Let  $h$  be a  $K$ -strongly convex regularizer on  $\mathcal{C}$ . Then, for all  $p \in \mathcal{X}$  and all  $y \in \mathcal{Y}$ ,*  
623 *we have:*

$$(a) \quad F(p, y) \geq 0 \quad \text{with equality if and only if } p = Q(y). \quad (\text{B.23a})$$

$$(b) \quad F(p, y) \geq \frac{1}{2}K \|Q(y) - p\|^2. \quad (\text{B.23b})$$

624 *Proof.* These properties are known in the literature, but we provide a quick proof for completeness.

625 (a) By the Fenchel–Young inequality, we have  $h(p) + h^*(y) \geq \langle y, p \rangle$  for all  $p \in \mathcal{X}, y \in \mathcal{Y}$ , with  
626 equality if and only if  $y \in \partial h(p)$ . Our claim then follows from (B.14).

627 (b) Let  $x = Q(y)$  so  $y \in \partial h(x)$  by (B.14). Then, by the definition of  $F$ , we have

$$\begin{aligned} F(p, y) &= h(p) + h^*(y) - \langle y, p \rangle \\ &= h(p) + \langle y, x \rangle - h(x) - \langle y, p \rangle && \# \text{ since } y \in \partial h(x) \\ &\geq h(p) - h(x) - \partial h(x; p - x) && \# \text{ by Proposition B.1} \\ &\geq \frac{1}{2}K \|x - p\|^2 && \# \text{ by (B.8)} \end{aligned}$$

628 so our proof is complete. ■

629 Our last result at this point is a useful differentiation formula for the Fenchel coupling:

630 **Lemma B.1.** *For all  $p \in \mathcal{X}$  and all  $y \in \mathcal{Y}$ , we have:*

$$\nabla_y F(p, y) = Q(y) - p. \quad (\text{B.24})$$

631 *Proof.* The proof follows immediately from Danskin's theorem, cf. Eq. (B.16) of Proposition B.1. ■

<sup>4</sup>The existence of the limit is guaranteed by elementary convex analysis arguments, cf. Bertsekas [7, App. B].

632 **B.2. Update lemmas.** Moving forward, we note that the basic update step of (FTRL) can be written  
 633 as

$$y^+ = y + w \quad \text{and} \quad x^+ = Q(y^+) \quad (\text{B.25})$$

634 for some  $y, w \in \mathcal{Y}$ . With this in mind, we state below a series of identities and estimates for the  
 635 Fenchel coupling before and after an update of the form (B.25).

636 The first is a primal-dual version of the so-called “three-point identity” for Bregman functions [13]:

637 **Lemma B.2.** *Fix some  $p \in \mathcal{X}$ ,  $y \in \mathcal{Y}$ , and let  $x = Q(y)$ . Then, for all  $y^+ \in \mathcal{Y}$ , we have:*

$$F(p, y^+) = F(p, y) + F(x, y^+) + \langle y^+ - y, x - p \rangle. \quad (\text{B.26})$$

638 *Proof.* By definition, we have:

$$F(p, y^+) = h(p) + h^*(y^+) - \langle y^+, p \rangle \quad (\text{B.27a})$$

$$F(p, y) = h(p) + h^*(y) - \langle y, p \rangle \quad (\text{B.27b})$$

$$F(x, y^+) = h(x) + h^*(y^+) - \langle y^+, x \rangle \quad (\text{B.27c})$$

639 Thus, subtracting (B.27b) and (B.27c) from (B.27a), and rearranging, we get

$$F(p, y^+) = F(p, y) + F(x, y^+) - h(x) - h^*(y) + \langle y^+, x \rangle - \langle y^+ - y, p \rangle. \quad (\text{B.28})$$

640 Our assertion then follows by recalling that  $x = Q(y)$ , so  $h(x) + h^*(y) = \langle y, x \rangle$ . ■

641 The next result we present concerns the Fenchel coupling before and after a direct update step; similar  
 642 results exist in the literature, but we again provide a proof for completeness.

643 **Lemma B.3.** *Fix some  $p \in \mathcal{X}$  and  $y, w \in \mathcal{Y}$ . Then, letting  $x = Q(y)$ ,  $y^+ = y + w$ , and  $x^+ = Q(y^+)$  as  
 644 per (B.25), we have:*

$$F(p, y^+) = F(p, y) + \langle w, x^+ - p \rangle - F(x^+, y) \quad (\text{B.29a})$$

$$\leq F(p, x) + \langle w, x - p \rangle + \frac{1}{2K} \|w\|_*^2. \quad (\text{B.29b})$$

645 *Proof.* By the three-point identity (B.26), we have

$$F(x, y) = F(x, y^+) + F(x^+, x) + \langle y - y^+, x^+ - p \rangle \quad (\text{B.30})$$

646 so our first claim is immediate. For our second claim, rearranging terms and employing the  
 647 Fenchel–Young inequality gives

$$\begin{aligned} & F(p, y) + \langle w, x^+ - p \rangle - F(x^+, y) \\ &= F(p, y) + \langle w, x - p \rangle + \langle w, x^+ - x \rangle - F(p, y) \\ &\leq F(p, y) + \langle w, x - p \rangle + \frac{1}{2K} \|w\|_*^2 + \frac{K}{2} \|x - p\|^2 - F(p, y) \end{aligned} \quad (\text{B.31})$$

648 so our claim follows from Proposition B.2. ■

## 649 C A short primer on stochastic analysis

650 In this appendix, we collect some standard results from stochastic analysis in order to provide a  
 651 degree of self-completeness to the main text. For an introduction to stochastic analysis and the theory  
 652 of SDEs, we refer the reader to the masterful accounts of Øksendal [50] and Kuo [32].

653 The main focus of the theory is the study of ordinary differential equations (ODEs) perturbed by  
 654 noise, modeled informally after the *Langevin equation*

$$\frac{dZ}{dt} = b(Z(t)) + \eta(t) \quad (\text{LE})$$

655 where  $Z(t)$  is a stochastic process in  $\mathbb{R}$ ,  $b: \mathbb{R} \rightarrow \mathbb{R}$  is the *drift* of the process, and  $\eta(t)$  is the “noise”  
 656 perturbing the deterministic ODE  $\dot{z} = b(z)$ . Unfortunately, albeit natural, the problem with (LE) is

that any reasonable continuous-time model of noise would lead to trajectories that are almost nowhere differentiable, so the meaning of “ $dZ/dt$ ” in (LE) is rather precarious.<sup>5</sup>

In lieu of this, to give formal meaning to (LE), we consider instead the *stochastic differential equation*

$$dZ(t) = b(Z(t)) dt + \sigma(Z(t)) dW(t) \quad (\text{SDE})$$

which is shorthand for the integral equation

$$Z(t) = \int_0^t b(Z(s)) ds + \int_0^t \sigma(Z(s)) dW(s). \quad (\text{C.1})$$

for some state-dependent *diffusion coefficient*  $\sigma: \mathbb{R} \rightarrow \mathbb{R}$ . The key element in the above formulation is the so-called *Itô integral* that appears in the right-hand side of (SDE), and which is defined relative to what is known as a standard *Brownian motion* on  $\mathbb{R}$ . Intuitively, what this means is that the integral  $\int_0^t \sigma(Z(s)) dW(s)$  is obtained in the limit  $\delta t = t_{k+1} - t_k \rightarrow 0$  of the discrete-time approximation

$$\int_0^t \sigma(Z(s)) dW(s) \approx \sum_{k=1}^{\lceil t/\delta t \rceil} \sigma(Z(t_k)) [W(t_{k+1}) - W(t_k)] \quad (\text{C.2})$$

where  $W(t)$  is some stochastic process that satisfies what one would expect from a “white noise” process (zero-mean, with independent increments), but is still “regular enough” to possess a reasonable behavior in the limit  $\delta t \rightarrow 0$ . These considerations lead to the formal definition of a Brownian motion—or, more precisely, the *Wiener process*—which is characterized by the following properties:

1. The increments of  $W$  are *independent*, that is, for all  $t, \tau > 0$ , the future increments  $W(t+\tau) - W(t)$  of  $W$  are independent of its past values  $W(s)$ ,  $s < t$ .
2. The increments of  $W$  are *Gaussian*, that is, for all  $t, \tau > 0$ , the future increments  $W(t+\tau) - W(t)$  of  $W$  are normally distributed with mean 0 and variance  $\tau$ , i.e.,  $W(t+\tau) - W(t) \sim \mathcal{N}(0, \tau)$ .
3. The sample paths of  $W$  are *continuous* (a.s.), i.e.,  $W(t)$  is a continuous function of  $t$  for almost every realization of  $W$ .

The existence of a process with the above properties is by no means a trivial affair, but it can be constructed e.g., as the scaling limit of a random walk, or some other discrete-time stochastic processes with stationary independent increments.

Providing a more detailed account of the definition of  $W(t)$  and the associated stochastic integral which appears in (SDE) is well beyond the scope of our paper; for an accessible introduction, we refer the reader to Øksendal [50, Chap. 2]. What is more important for our purposes is that, albeit non-differentiable, the solution  $Z(t)$  still satisfies a certain version of the chain rule, known as *Itô’s formula* [25]. Specifically, for any  $C^2$  function  $f: \mathbb{R} \rightarrow \mathbb{R}$ , we have

$$df(Z(t)) = f'(Z(t))b(Z(t)) dt + \frac{1}{2}f''(Z(t))\sigma^2(t) dt + f'(Z(t))\sigma(Z(t)) dW(t) \quad (\text{C.3})$$

or, more compactly:

$$df(Z(t)) = f'(Z(t)) dZ(t) + \frac{1}{2}f''(Z(t)) dZ(t) \cdot dZ(t) \quad (\text{C.4})$$

where the product  $dZ \cdot dZ$  is computed according to the rules of stochastic calculus [50]:

$$dt \cdot dt = 0 \quad dt \cdot dW(t) = 0 \quad \text{and} \quad dW(t) \cdot dW(t) = dt. \quad (\text{C.5})$$

Thanks to Itô’s formula, we can still do calculus with stochastic processes satisfying (SDE); the resulting set of differentiation rules is known as *Itô—or stochastic—calculus*.

For our purposes, we will consider multi-dimensional analogues of (SDE) where, *mutatis mutandis*, (i)  $Z(t)$  evolves in  $\mathbb{R}^n$ ; (ii) the drift of the process is given by a vector field  $b: \mathbb{R}^n \rightarrow \mathbb{R}^n$ ; (iii)  $W(t)$  is an  $m$ -dimensional Brownian motion evolving in  $\mathbb{R}^m$ ; and (iv)  $\sigma: \mathbb{R}^n \rightarrow \mathbb{R}^{n \times m}$  is the *diffusion matrix* of the SDE. In this case, Itô’s formula for a  $C^2$  function  $f: \mathbb{R}^n \rightarrow \mathbb{R}$  becomes

$$\begin{aligned} df(Z(t)) = & \sum_{i=1}^n b_i(Z(t)) \frac{\partial f}{\partial z_i} dt + \frac{1}{2} \sum_{i,j=1}^n \sum_{k=1}^m \sigma_{ik}(Z(t)) \sigma_{jk}(Z(t)) \frac{\partial^2 f}{\partial z_i \partial z_j} dt \\ & + \sum_{i=1}^n \sum_{k=1}^m \sigma_{ik}(Z(t)) \frac{\partial f}{\partial z_i} dW_k(t) \end{aligned} \quad (\text{C.6})$$

<sup>5</sup>In particular, consider a noise process  $\eta(t)$  which is a) *zero-mean*:  $\mathbb{E}[\eta(t)] = 0$ ; b) *uncorrelated*:  $\mathbb{E}[\eta(t_1)\eta(t_2)] = 0$  if  $t_2 \neq t_1$ ; and c) *stationary*, in the sense that  $\eta(t+s)$  and  $\eta(t)$  are identically distributed for all  $s > 0$ . Then, any such process does not have continuous paths [50, p. 21].



691 In our analysis, we will also require a weaker version of Itô's formula for convex functions  $f: \mathbb{R}^n \rightarrow$   
692  $\mathbb{R}$  that are not  $C^2$  but are only  $L$ -Lipschitz smooth, i.e.,  $C^1$ -smooth with  $L$ -Lipschitz continuous  
693 derivatives. We borrow the precise statement from [42, Proposition C.2] which, in our notation, gives

$$f(Z(t)) \leq f(Z(0)) + \sum_{i=1}^n \int_0^t \partial_{z_i} f(Z(s)) dZ_i(s) + \frac{L}{2} \int_0^s \text{tr}[\sigma(Z(s)) \sigma(Z(s))^\top] ds \quad (\text{C.7})$$

694 or, more explicitly,

$$\begin{aligned} f(Z(t)) \leq & f(Z(0)) + \sum_{i=1}^n \int_0^t b_i(Z(s)) \partial_{z_i} f(Z(s)) ds + \frac{L}{2} \int_0^s \text{tr}[\sigma(Z(s)) \sigma(Z(s))^\top] ds \\ & + \sum_{i=1}^n \sum_{k=1}^m \int_0^t \sigma_{ik}(Z(s)) \partial_{z_i} f(Z(s)) dW_k(s). \end{aligned} \quad (\text{C.8})$$

695 The deterministic part of (the strong version of) Itô's formula for  $C^2$ -smooth functions is captured  
696 by the so-called *infinitesimal generator* of (SDE), defined here as the differential operator  $\mathcal{L}$  whose  
697 action on  $f$  is given by

$$\mathcal{L}f(x) = \sum_{i=1}^n b_i(x) \frac{\partial f}{\partial z_i} + \frac{1}{2} \sum_{i,j=1}^n \sum_{k=1}^m \sigma_{ik}(x) \sigma_{jk}(x) \frac{\partial^2 f}{\partial z_i \partial z_j} \quad \text{for all } z \in \mathbb{R}^n. \quad (\text{C.9})$$

698 Accordingly, Itô's formula can be written more compactly as

$$df(Z(t)) = \mathcal{L}f(Z(t)) dt + \nabla_z f(Z(t))^\top \sigma(Z(t)) dW(t). \quad (\text{C.10})$$

699 Thus, letting  $\mathbb{P}_z(\cdot)$  denote the law of  $Z$  initialized at  $Z(0) \leftarrow z \in \mathbb{R}^n$ , and writing  $\mathbb{E}_z[\cdot]$  for the  
700 corresponding expectation, we readily get

$$\mathbb{E}_z[f(Z(t))] = f(z) + \mathbb{E}_z \left[ \int_0^t \mathcal{L}f(Z(s)) ds \right] \quad \text{for all } t \geq 0. \quad (\text{C.11})$$

701 This shows that the infinitesimal generator of  $Z$  captures precisely the mean part of the evolution of  
702  $f(Z(t))$  under (SDE). In fact, this simple expression admits a far-reaching generalization known as  
703 *Dynkin's formula* [50, Chap. 7.4]:

704 **Proposition C.1** (Dynkin's formula). *Suppose that  $Z(t)$  is initialized at  $Z(0) \leftarrow z \in \mathbb{R}^n$ . Then, for*  
705 *every bounded stopping time  $\tau$  and every  $C^2$ -smooth function  $f: \mathbb{R}^n \rightarrow \mathbb{R}$ , we have*

$$\mathbb{E}_z[f(Z(\tau))] = f(z) + \mathbb{E}_z \left[ \int_0^\tau \mathcal{L}f(Z(s)) ds \right]. \quad (\text{C.12})$$

706 Moving forward, the matrix

$$A(z) = \sigma(z) \sigma(z)^\top \quad (\text{C.13})$$

707 or, in components,

$$A_{ij}(z) = \sum_{k=1}^m \sigma_{ik}(z) \sigma_{jk}(z) \quad i, j = 1, \dots, n, \quad (\text{C.14})$$

708 is known as the *principal symbol* of  $\mathcal{L}$ , and we say that  $\mathcal{L}$  is *uniformly elliptic* if there exists some  
709  $c > 0$  such that  $u^\top A(z) u \geq c \|u\|^2$  for all  $z, u \in \mathbb{R}^n$  (that is, if the eigenvalues of  $A(z)$  are positive  
710 and uniformly bounded away from 0). If this is the case, the noise in (SDE) is “uniformly exciting”  
711 in the sense that it does not vanish along any direction at any point of the state space of the process.  
712 Concretely, by standard results—see e.g., [48, Sec. 3.3.6.1] and references therein—this implies that  
713 every region of  $\mathbb{R}^n$  is visited by  $Z(t)$  with positive probability, viz.

$$\mathbb{P}_z(Z(t) = z' \text{ for some } t > 0) > 0 \quad \text{for all } z, z' \in \mathbb{R}^n. \quad (\text{C.15})$$

714 If (SDE) is uniformly elliptic—i.e., if the infinitesimal generator thereof is uniformly elliptic—the  
715 behavior of  $Z(t)$  can be further classified as *transient* or *recurrent*. Formally, these two fundamental  
716 notions are defined as follows:

717 **Definition C.1.** Suppose that (SDE) is initialized at some  $z \in \mathbb{R}^n$ . Then:

- 718 1.  $Z(t)$  is *transient* from  $z \in \mathbb{R}^n$  if it escapes every compact subset  $\mathcal{K}$  of  $\mathbb{R}^n$  in finite time, i.e., there  
719 exists some (possibly random)  $T_{\mathcal{K}} < \infty$  such that

$$\mathbb{P}_z(Z(t) \notin \mathcal{K} \text{ for all } t \geq T_{\mathcal{K}}) = 1. \quad (\text{C.16})$$

- 720 2.  $Z(t)$  is *recurrent* relative to a compact subset  $\mathcal{K}$  of  $\mathbb{R}^n$  if the hitting time

$$\tau_{\mathcal{K}} = \inf\{t > 0 : Z(t) \in \mathcal{K}\} \quad (\text{C.17})$$

721 is finite (a.s.). If, in addition,  $\mathbb{E}[\tau_{\mathcal{K}}] < \infty$ , we will say that  $Z(t)$  is *positive recurrent*; otherwise,  
722  $Z(t)$  will be called *null recurrent*.

723 If (SDE) is uniformly elliptic, we have the following fundamental dichotomy:

724 **Theorem C.1** (Transience / recurrence dichotomy). *Suppose that (SDE) is uniformly elliptic. Then:*

- 725 1. *If (SDE) is positive recurrent (resp. null recurrent) for some initial condition  $z \in \mathbb{R}^n$  and some*  
726 *compact subset  $\mathcal{K}$  of  $\mathbb{R}^n$ , then it is positive recurrent (resp. null recurrent) for every initial*  
727 *condition and every compact subset of  $\mathbb{R}^n$ .*  
728 2. *If (SDE) is transient from some initial condition  $z \in \mathbb{R}^n$ , it is transient from every initial condition.*

729 For a more detailed version of [Theorem C.1](#), we refer the reader to Bhattacharya [8, Proposition 3.1]  
730 who, to the best of our knowledge, was the first to state and prove this criterion. In words, [Theorem C.1](#)  
731 simply states that, as long as (SDE) is uniformly elliptic, then it is *either transient or recurrent*; and  
732 if it is recurrent, it is *either positive or null recurrent*; no other outcome is possible. The choice of  
733 initialization or compact set in [Definition C.1](#) does not matter (so, in particular,  $Z$  cannot be transient  
734 from some region of  $\mathbb{R}^n$  and recurrent from another). This crisp separation of regimes will play a  
735 major role in our analysis, and we will refer to it as the *transience / recurrence dichotomy*.

736 An important consequence of positive recurrence is that, under uniform ellipticity,  $Z(t)$  admits a  
737 unique *invariant measure*, that is, a probability measure  $\nu$  on  $\mathbb{R}^n$  such that  $Z(t) \sim \nu$  for all  $t \geq 0$   
738 whenever  $Z(0) \sim \nu$ . Importantly, the proviso that  $\nu$  is a probability measure implies that  $\nu(\mathbb{R}^n) < \infty$ ;  
739 if the process is null-recurrent, the semigroup of flows of (SDE) still admits an invariant measure in  
740 the sense of Khasminskii [28], but this measure is no longer finite, i.e.,  $\nu(\mathbb{R}^n) = \infty$ . Finally, if the  
741 process is transient, (SDE) does not admit such a measure.

## 742 D Analysis and results in continuous time

743 We now proceed to prove the continuous-time results for (S-FTRL) that we presented in [Section 3](#).

744 **D.1. Proofs omitted from [Section 3.1](#).** We begin with the “gentle start” results of [Section 3.1](#), which  
745 we restate below for convenience.

746 **Proposition 1.** *Suppose that (S-GDA) is run on the game (6a) with initial condition  $x_0 \in \mathbb{R}^2$ . Then:*

- 747 1.  $\lim_{t \rightarrow \infty} \mathbb{E}_{x_0}[\|X(t)\|_2^2] = \infty$ , i.e.,  $X(t)$  escapes to infinity in mean square.  
748 2.  $\mathbb{E}_{x_0}[\tau_r] = \infty$  if  $r < \|x_0\|$ , i.e.,  $X(t)$  takes infinite time on average to get closer to equilibrium.  
749 3. The limit  $\mathcal{P}_{\infty}(x) = \lim_{t \rightarrow \infty} \mathcal{P}(x, t)$  does not exist, i.e.,  $X$  does not admit an invariant distribution.

750 **Proposition 2.** *Suppose that (S-GDA) is run on the game (6b) with initial condition  $x_0 \in \mathbb{R}^2$ . Then:*

- 751 1.  $\lim_{t \rightarrow \infty} \mathbb{E}_{x_0}[\|X(t)\|_2^2] = \sigma^2$ , i.e., the dynamics fluctuate at mean distance  $\sigma$  from equilibrium.  
752 2. The mean time required to get within distance  $r$  of the game’s equilibrium is bounded as

$$\mathbb{E}_{x_0}[\tau_r] \leq \frac{1}{2} \frac{\|x_0\|_2^2 - r^2}{r^2 - \sigma^2} \quad \text{for all } \sigma < r < \|x_0\|_2. \quad (10)$$

- 753 3. The density of  $X(t)$  is  $\mathcal{P}(x, t) = [\pi\sigma^2(1 - e^{-2t})]^{-1} \exp\left(-\frac{\|x - e^{-t}x_0\|_2^2}{(1 - e^{-2t})\sigma^2}\right)$ . In particular,  $X(t)$  con-  
754 verges in distribution to a Gaussian random variable *centered at 0*, viz.

$$\mathcal{P}_{\infty}(x) \equiv \lim_{t \rightarrow \infty} \mathcal{P}(x, t) = 1/(\pi\sigma^2) \cdot e^{-\|x\|_2^2/\sigma^2}. \quad (11)$$

755 *Proof of Proposition 1.* For our first claim, note that Itô's formula (C.6) applied to the function  
 756  $f(x) = \|x\|_2^2$  under the dynamics (S-GDA) for the game (6a) readily yields the expression

$$d(\|X(t)\|_2^2) = 2X(t) \cdot dX(t) + dX(t) \cdot dX(t) = 2\sigma^2 dt + \sigma X(t) \cdot dW(t). \quad (\text{D.1})$$

757 Hence, by (C.11), we get

$$\mathbb{E}_{x_0}[\|X(t)\|_2^2] = 2\sigma^2 t, \quad (\text{D.2})$$

758 which proves our claim.

759 For our second claim, consider the hitting time  $\tau = \inf\{t > 0 : \|X(t)\|_2 \leq r\}$  with  $r < \|x_0\|_2$ , and  
 760 assume that  $\mathbb{E}[\tau] < \infty$ . Then, by Dynkin's formula (Proposition C.1) applied to  $f(x) = \|x\|_2^2$  and  $\tau$ ,  
 761 we readily get

$$\mathbb{E}_{x_0}[f(X(\tau))] = f(x_0) + \mathbb{E}_{x_0}\left[\int_0^\tau 2\sigma^2 ds\right] = f(x_0) + 2\sigma^2 \mathbb{E}_{x_0}[\tau] \geq \|x_0\|_2^2. \quad (\text{D.3})$$

762 However, since  $f(X(\tau)) = r^2$  by construction, we readily get  $r^2 \geq \|x_0\|_2^2$ , a contradiction. This  
 763 shows that  $\mathbb{E}_{x_0}[\tau] = \infty$ , as asserted.

764 Finally, for our third claim, it is easy to check that (S-GDA) is uniformly elliptic under the stated  
 765 assumptions. Thus, by Theorem C.1 and the fact that  $\mathbb{E}_{x_0}[\tau] = \infty$ , it follows that  $X(t)$  cannot be  
 766 positive recurrent. By the discussion following Theorem C.1, this implies that  $X(t)$  does not admit an  
 767 invariant measure, so the density  $\mathcal{P}(x, t)$  of  $X(t)$  does not converge to a limit either. ■

768 *Proof of Proposition 2.* Under the dynamics (S-GDA) for the game (6b), each coordinate of  $X(t)$   
 769 evolves as an Ornstein–Uhlenbeck process, viz.

$$dX_i(t) = -X_i(t) dt + \sigma dW_i(t) \quad \text{for } i = 1, 2. \quad (\text{D.4})$$

770 Since the processes are decoupled, we conclude by standard stochastic analysis arguments [32,  
 771 Example 7.4.5] that

$$X_i(t) = X_i(0)e^{-t} + \sigma \int_0^t e^{-(t-s)} dW_i(s). \quad (\text{D.5})$$

772 In turn, by [32, Theorem 7.4.7], this implies that the transition probability kernel of  $X_i(t)$  is given by

$$\mathcal{P}_i(x_i, t) = \frac{1}{\sigma\sqrt{\pi(1-e^{-2t})}} \exp\left(-\frac{(x_i - e^{-t}x_{i,0})^2}{(1-e^{-2t})\sigma^2}\right) \quad \text{for } i = 1, 2, \quad (\text{D.6})$$

773 that is,  $X_i(t)$  follows a Gaussian distribution with mean  $\mathbb{E}_{x_{i,0}}[X_i(t)] = x_{i,0}e^{-t}$  and variance

$$\mathbb{E}[X_i^2(t)] = \frac{\sigma^2}{2}(1 - e^{-2t}). \quad (\text{D.7})$$

774 Our first and third claims then follow immediately.

775 For our second claim, note that the infinitesimal generator of  $X(t)$  is now given by

$$\mathcal{L}f(x) = -\langle \nabla f(x), x \rangle + \frac{1}{2}\sigma^2 \Delta f(x), \quad (\text{D.8})$$

776 where  $\Delta f \equiv \text{tr } \nabla^2 f$  denotes the Laplacian of  $f$ . Then, Dynkin's formula (Proposition C.1) applied to  
 777  $f(x) = \|x\|_2^2$  at the truncated hitting time  $\tau_r \wedge t \equiv \min\{\tau_r, t\}$ ,  $t > 0$ , readily yields

$$\begin{aligned} \mathbb{E}_{x_0}[\|X(\tau_r \wedge t)\|_2^2] &= \|x_0\|_2^2 + \mathbb{E}_{x_0}\left[\int_0^{\tau_r \wedge t} 2[\sigma^2 - \|X(s)\|_2^2] ds\right] \\ &\leq \|x_0\|_2^2 + \mathbb{E}_{x_0}\left[\int_0^{\tau_r \wedge t} 2(\sigma^2 - r^2) ds\right] \\ &= \|x_0\|_2^2 + 2(\sigma^2 - r^2) \mathbb{E}_{x_0}[\tau_r \wedge t]. \end{aligned} \quad (\text{D.9})$$

778 Since  $\|X(\tau_r \wedge r)\|_2^2 \geq r^2$  by construction (recall that  $\|x_0\|_2 > r$ ), we get

$$\mathbb{E}_{x_0}[\tau_r \wedge t] \leq \frac{\|x_0\|_2^2 - r^2}{2(r^2 - \sigma^2)} \quad \text{for all } t > 0. \quad (\text{D.10})$$

779 Since  $\mathbb{E}_{x_0}[\tau_r \wedge t]$  is uniformly bounded, our claim follows by taking the limit  $t \rightarrow \infty$  (so  $\tau_r \wedge t \rightarrow \tau_r$   
 780 pointwise), and invoking the dominated convergence theorem. ■

781 **D.2. General properties of the dynamics (S-FTRL).** We now proceed to establish the properties  
 782 of the stochastic dynamics (S-FTRL) in the general case, for null- and strongly monotone games  
 783 respectively. Before doing so, we begin with a result of a book-keeping nature (which is, however,  
 784 necessary to ensure that the ensuing questions are meaningful).

785 **Proposition D.1.** *Suppose that  $\sigma$  is Lipschitz continuous. Then, for every initial condition  $X(0) \leftarrow$   
 786  $x_0 = Q(y_0) \in \mathcal{X}$ , the dynamics (S-FTRL) admit a unique strong solution that exists for all time.*

787 *Proof.* Note that the dynamics (S-FTRL) can be recast in fully autonomous form as

$$dY(t) = v(Q(Y(t))) dt + \sigma(Q(Y(t))) \cdot dW(t). \quad (\text{D.11})$$

788 Note further that  $v$ ,  $\sigma$  and  $Q$  are all Lipschitz, by our standing assumptions for the game, our  
 789 assumptions here, and Proposition B.1 respectively. In turn, this implies that the compositions  
 790  $\tilde{v} = v \circ Q$  and  $\tilde{\sigma} = \sigma \circ Q$  are likewise Lipschitz continuous, so our claim follows from the existence  
 791 and uniqueness theorem for SDEs with Lipschitz data, see e.g., [50, Theorem 5.2.1]. ■

792 Our next result is an ancillary calculation responsible for much of the heavy lifting in the upcoming  
 793 analysis.

794 **Proposition D.2.** *Fix a base point  $p \in \mathcal{X}$  and consider the energy function*

$$E(y) := F(p, y) = h(p) + h^*(y) - \langle y, p \rangle \quad \text{for } y \in \mathcal{Y}. \quad (\text{D.12})$$

795 *Then, for every stopping time  $\tau \geq 0$ , we have*

$$\begin{aligned} E(Y(\tau)) - E(Y(0)) &\leq \int_0^\tau \langle v(X(s)), X(s) - p \rangle ds + \frac{\sigma_{\max}^2}{2K} \tau \\ &\quad + \int_0^\tau (X(s) - p)^\top \sigma(X(s)) dW(s). \end{aligned} \quad (\text{D.13})$$

796 *If, in particular,  $Q$  is smooth, we have*

$$\begin{aligned} E(Y(\tau)) - E(Y(0)) &= \int_0^\tau \langle v(X(s)), X(s) - p \rangle ds \\ &\quad + \frac{1}{2} \int_0^\tau \text{tr}[\Sigma(X(s)) \text{Jac } Q(Y(s))] ds \\ &\quad + \int_0^\tau (X(s) - p)^\top \sigma(X(s)) dW(s). \end{aligned} \quad (\text{D.14})$$

797 *Proof.* Assume first that  $Q$  is  $C^1$ -smooth; In this case, by Lemma B.1, we have  $\nabla F(p, y) = Q(y) - p$ ,  
 798 and hence,

$$\nabla^2 E(y) = \nabla^2 h^*(y) = \text{Jac } Q(y). \quad (\text{D.15})$$

799 Thus, by Itô's formula (C.6), we readily get

$$\begin{aligned} dE(Y(t)) &= (X(t) - p) \cdot dY(t) + \frac{1}{2} \text{tr}[\sigma^\top(X(t)) \nabla^2 E(Y(t)) \sigma(X(t))] dt \\ &= \langle v(X(t)), X(t) - p \rangle dt \\ &\quad + \frac{1}{2} \text{tr}[\Sigma(X(t)) \text{Jac } Q(Y(t))] dt \\ &\quad + (X(t) - p)^\top \sigma(X(t)) dW(t) \end{aligned} \quad (\text{D.16})$$

800 so (D.14) follows.

801 Now, if  $Q$  is not smooth, Proposition B.1 shows that it is still  $(1/K)$ -Lipschitz continuous, which,  
 802 equivalently, means that  $h^*$  is  $(1/K)$ -Lipschitz smooth. Thus, (D.13) follows by the weak Itô formula  
 803 for Lipschitz smooth functions (C.7) applied to  $h^*$ , and noting that  $\text{tr}[\sigma(x)\sigma(x)^\top] \leq d\sigma_{\max}^2$ . ■

804 **D.3. The null-monotone case.** We begin our analysis proper with our result for null-monotone  
805 games, which we restate below for convenience.

806 **Theorem 1** (Null-monotone games). *Suppose that (S-FTRL) is run with a smooth mirror map  $Q$*   
807 *in a null-monotone game  $\mathcal{G}$  that admits an interior equilibrium  $x^*$ , and consider the hitting times*  
808  *$\tau_\varepsilon^- := \inf\{t > 0 : F_t \leq F_0 - \varepsilon\}$  and  $\tau_\varepsilon^+ := \inf\{t > 0 : F_t \geq F_0 + \varepsilon\}$ . If  $\sigma_{\min}^2 > 0$  and  $\varepsilon > 0$  is small*  
809 *enough, then*

$$\mathbb{E}_{x_0}[\tau_\varepsilon^-] = \infty \quad \text{and} \quad \mathbb{E}_{x_0}[\tau_\varepsilon^+] \leq 2\varepsilon / (\kappa \sigma_{\min}^2) \quad (15)$$

810 *for some positive constant  $\kappa \equiv \kappa_\varepsilon > 0$ ; in addition,  $X(t)$  does not admit a limiting distribution.*

811 *Proof.* We start with the decreasing case, where we argue by contradiction. Specifically, let  $x^*$  be an  
812 equilibrium of  $\mathcal{G}$ , and assume that  $\mathbb{E}_{x_0}[\tau_\varepsilon^-] < \infty$ . Then, by applying Dynkin's formula to the energy  
813 function  $E(y)$  at  $\tau_\varepsilon^-$  for  $p \leftarrow x^*$  (cf. Propositions C.1 and D.2), we readily get

$$\begin{aligned} \mathbb{E}_{x_0}[E(Y(\tau_\varepsilon^-))] &= E(y_0) + \mathbb{E}_{x_0} \left[ \int_0^{\tau_\varepsilon^-} \left( \langle v(X(s)), X(s) - x^* \rangle + \frac{1}{2} \text{tr}[\Sigma(X(s)) \text{Jac } Q(Y(s))] \right) ds \right] \\ &= F_0 + \frac{1}{2} \mathbb{E}_{x_0} \left[ \int_0^{\tau_\varepsilon^-} \text{tr}[\Sigma(X(s)) \text{Jac } Q(Y(s))] ds \right] \quad \# \text{ by null monotonicity} \\ &\geq F_0 \end{aligned} \quad (D.17)$$

814 where the last line follows from the fact that  $\Sigma$  and  $\text{Jac } Q$  are both positive-semidefinite. However,  
815 since  $\mathbb{E}_{x_0}[E(Y(\tau_\varepsilon^-))] = F_0 - \varepsilon$  by the definition of  $\tau_\varepsilon^-$ , we get  $F_0 - \varepsilon \geq F_0$ , a contradiction which  
816 establishes our claim.

817 Since  $\sigma_{\min} > 0$ , we further conclude that  $Y(t)$  is uniformly elliptic. Thus, for any compact set  
818  $\mathcal{K} \subseteq \{y \in \mathcal{Y} : F(x^*, y) \leq F_0 - \varepsilon\}$ , the hitting time  $\tau_{\mathcal{K}} = \inf\{t > 0 : Y(t) \in \mathcal{K}\}$  will be infinite on  
819 average (because  $\mathbb{E}_{x_0}[\tau_{\mathcal{K}}] \geq \mathbb{E}_{x_0}[\tau_\varepsilon^-] = \infty$ ), so, by Theorem C.1,  $Y(t)$  cannot be positive recurrent.  
820 In turn, this implies that  $Y(t)$  does not admit an invariant measure on  $\mathcal{Y}$ , which proves our claim.

821 Finally, for the second part of (15), applying Dynkin's formula to the energy function  $E(y)$  for  
822  $p \leftarrow x^*$  at the truncated hitting times  $\tau_\varepsilon^+ \wedge t$ ,  $t > 0$ , we get:

$$\begin{aligned} \mathbb{E}_{x_0}[E(Y(\tau_\varepsilon^+ \wedge t))] &= E(y_0) + \mathbb{E}_{x_0} \left[ \int_0^{\tau_\varepsilon^+ \wedge t} \left( \langle v(X(s)), X(s) - x^* \rangle + \frac{1}{2} \text{tr}[\Sigma(X(s)) \text{Jac } Q(Y(s))] \right) ds \right] \\ &= F_0 + \frac{1}{2} \mathbb{E}_{x_0} \left[ \int_0^{\tau_\varepsilon^+ \wedge t} \text{tr}[\Sigma(X(s)) \text{Jac } Q(Y(s))] ds \right] \quad \# \text{ by null monotonicity} \\ &\geq F_0 + \frac{\sigma_{\min}^2}{2} \mathbb{E}_{x_0} \left[ \int_0^{\tau_\varepsilon^+ \wedge t} \text{tr}[\text{Jac } Q(Y(s))] ds \right] \end{aligned} \quad (D.18)$$

823 where the last line follows from the estimate

$$\begin{aligned} \text{tr}[\Sigma \text{Jac } Q] &= \text{tr}[(\text{Jac } Q)^{1/2} \Sigma (\text{Jac } Q)^{1/2}] \\ &= (1, \dots, 1) \cdot (\text{Jac } Q)^{1/2} \Sigma (\text{Jac } Q)^{1/2} \cdot (1, \dots, 1)^\top \\ &\geq \sigma_{\min}^2 (1, \dots, 1) \cdot (\text{Jac } Q)^{1/2} \cdot (\text{Jac } Q)^{1/2} \cdot (1, \dots, 1)^\top \\ &= \sigma_{\min}^2 \text{tr}[\text{Jac } Q]. \end{aligned} \quad (D.19)$$

824 By the assumptions of the theorem (smooth  $Q$  and interior initialization), it follows that the (necessar-  
825 ily compact) set  $\mathcal{D}_\varepsilon := \{x = Q(y) : F(x^*, y) \leq F_0 + \varepsilon\}$  is contained in the relative interior  $\text{ri } \mathcal{X}$  of  $\mathcal{X}$ .  
826 In turn, this implies that  $\kappa \equiv \kappa_\varepsilon := \min\{\text{tr}[\text{Jac } Q(y)] : F(x^*, y) \leq F_0 + \varepsilon\} > 0$ , so (D.18) becomes

$$F_0 + \varepsilon \geq F_0 + \frac{1}{2} \kappa \sigma_{\min}^2 \mathbb{E}_{x_0}[\tau_\varepsilon^+ \wedge t] \quad (D.20)$$

827 and hence

$$\mathbb{E}_{x_0}[\tau_\varepsilon^+ \wedge t] \leq \frac{2\varepsilon}{\kappa \sigma_{\min}^2} \quad \text{for all } t \geq 0. \quad (D.21)$$

828 This shows that  $\mathbb{E}_{x_0}[\tau_\varepsilon^+ \wedge t]$  is uniformly bounded, so the upper bound in (15) follows by letting  
829  $t \rightarrow \infty$  (which implies  $\tau_\varepsilon^+ \wedge t \rightarrow \tau_\varepsilon^+$  pointwise), and invoking the dominated convergence theorem. ■



**D.4. The strongly monotone case.** We now turn to our main result for strongly monotone games. Our proof strategy draws on methods related to the analysis of (S-FTRL) in the context of convex minimization, as explored by [42], and incorporating ideas that can be traced back to [24].

For convenience, we begin by restating Theorem 2.

**Theorem 2** (Strongly monotone games). *Suppose that (S-FTRL) is run in an  $\alpha$ -strongly monotone game  $\mathcal{G}$ , and consider the hitting time  $\tau_r := \inf\{t > 0 : X(t) \in \mathbb{B}_r(x^*)\}$  for a ball  $\mathbb{B}_r(x^*) = \{x : \|x - x^*\| \leq r\}$  of radius  $r$  centered on the (necessarily unique) equilibrium  $x^*$  of  $\mathcal{G}$ . Then:*

$$\mathbb{E}_{x_0}[\tau_r] \leq (F_0/\alpha)/(r^2 - r_\sigma^2) \quad \text{for all } r > r_\sigma, \quad (16)$$

where  $r_\sigma := \sigma_{\max}/\sqrt{2K\alpha}$ . If, in addition,  $\sigma_{\min} > 0$  and  $x^*$  is interior,  $X(t)$  admits an invariant distribution concentrated in a ball of radius  $\mathcal{O}(\sigma_{\max})$  around  $x^*$ , and we have

$$\lim_{t \rightarrow \infty} \mu_t(\mathbb{B}_r(x^*)) \geq 1 - r_\sigma^2/r^2 \quad \text{for all } r > r_\sigma. \quad (17)$$

*Proof.* Our proof proceeds along the following basic steps:

*Step 1.* Deriving an estimate for the mean hitting time  $\mathbb{E}_{x_0}[\tau_r]$ .

*Step 2.* Descending to a restricted process  $\tilde{Y}(t)$  where any redundant degrees of freedom in  $Y(t)$  have been “modded out”.

*Step 3.* Showing that the restricted process is positive recurrent.

*Step 4.* Estimating the resulting invariant distribution and pushing the result forward to  $X(t)$ .

In what follows, we go through the steps outlined above, one at a time.

**Step 1: Estimating the hitting time.** We begin with the hitting time estimate (16). To that end, setting  $p \leftarrow x^*$  in Proposition D.2, we get

$$\begin{aligned} E(Y(\tau)) - E(y_0) &= \int_0^\tau \langle v(X(s)), X(s) - x^* \rangle ds + \frac{1}{2K} \int_0^\tau \text{tr}[\Sigma(X(s))] ds \\ &\quad + \int_0^\tau (X(s) - x^*)^\top \sigma(X(s)) dW(s) \\ &\leq -\alpha \int_0^\tau \|X(s) - x^*\|^2 ds + \frac{\sigma_{\max}^2}{2K} \tau + M(\tau). \end{aligned} \quad (D.22)$$

where we set

$$M(t) = \int_0^t (X(s) - x^*)^\top \sigma(X(s)) dW(s). \quad (D.23)$$

Thus, by a quick rearrangement, we obtain

$$\alpha \int_0^\tau \|X(s) - x^*\|^2 ds \leq E(y_0) - E(Y(\tau)) + \frac{\sigma_{\max}^2}{2K} \tau + M(\tau) \quad (D.24)$$

and hence, with  $E \geq 0$ :

$$\int_0^\tau \|X(s) - x^*\|^2 ds \leq \frac{F_0}{\alpha} + \frac{\sigma_{\max}^2}{2\alpha K} \tau + \frac{M(\tau)}{\alpha}. \quad (D.25)$$

Thus, applying the above to the truncated hitting time  $\tau \leftarrow \tau_r \wedge t \equiv \min\{\tau_r, t\}$ ,  $t > 0$ , we get

$$\begin{aligned} r^2 \mathbb{E}_{x_0}[\tau_r \wedge t] &\leq \mathbb{E}_{x_0} \left[ \int_0^{\tau_r \wedge t} \|X(s) - x^*\|^2 ds \right] \quad \# \text{ b/c } \|X(s) - x^*\| \geq r \text{ for } s \leq \tau_r \wedge t \\ &\leq \frac{F_0}{\alpha} + r_\sigma^2 \mathbb{E}_{x_0}[\tau_r \wedge t] + \frac{1}{\alpha} \mathbb{E}_{x_0}[M(\tau_r \wedge t)]. \end{aligned} \quad (D.26)$$

Since  $\tau_r \wedge t \leq t$  is uniformly bounded, we will have  $\mathbb{E}_{x_0}[M(\tau_r \wedge t)] = \mathbb{E}[M(0)] = 0$  by the optional sampling theorem for continuous-time martingales [27, Theorem 3.22]. Thus, a simple rearrangement gives

$$\mathbb{E}_{x_0}[\tau_r \wedge t] \leq \frac{F_0/\alpha}{r^2 - r_\sigma^2} \quad \text{for all } t \geq 0. \quad (D.27)$$

This shows that  $\mathbb{E}_{x_0}[\tau_r \wedge t]$  is uniformly bounded, so the bound (16) follows by letting  $t \rightarrow \infty$  (which implies  $\tau_r \wedge t \rightarrow \tau_r$  pointwise), and invoking the dominated convergence theorem.

857 **Step 2: Descending to the restricted process.** We now proceed to examine the recurrence  
 858 properties of  $X(t)$ . To that end, note first that the assumption  $\sigma_{\min} > 0$  directly implies that (S-FTRL)  
 859 is uniformly elliptic in the sense discussed in Appendix C. As such, consider the set

$$\mathcal{D}_r := Q^{-1}(\mathbb{B}_r(x^*)) = \{y \in \mathcal{Y} : \|Q(y) - x^*\| \leq r\}. \quad (\text{D.28})$$

860 and note that

$$\tau_r = \inf\{t > 0 : X(t) \in \mathbb{B}_r(x^*)\} = \inf\{t > 0 : Y(t) \in \mathcal{D}_r\} \quad (\text{D.29})$$

861 so  $Y(t)$  is positive recurrent relative to  $\mathcal{D}_r$ . Thus, if  $\mathcal{D}_r$  is compact, Theorem C.1 immediately shows  
 862 that  $Y(t)$  is positive recurrent, and hence admits an invariant measure  $\nu$  on  $\mathcal{Y}$ . In general however,  
 863  $\mathcal{D}_r$  need not be compact, so we cannot conclude that  $Y(t)$  is recurrent from the fact that it hits  $\mathcal{D}_r$  in  
 864 finite time on average.

865 To circumvent this difficulty, we will consider a “restricted” process which is positive recurrent,  
 866 while retaining all information present in  $Y(t)$ . The main idea here will be to “collapse” the fibers  
 867 of  $Q$ , that is, those directions in  $\mathcal{Y}$  which map to the same point in  $\mathcal{X}$  under  $Q$ : since the dynamics  
 868 (S-FTRL) factor through  $X(t) = Q(Y(t))$ , these directions carry no relevant information, so they can  
 869 be effectively discarded.

870 To carry all this out, let  $\tilde{\mathcal{V}}$  denote the “tangent hull” of  $\mathcal{X}$  in  $\mathcal{Y}$ , viz.

$$\tilde{\mathcal{V}} := \text{aff}(\mathcal{X} - \mathcal{X}) = \{z \in \mathcal{Y} : x + tz \in \mathcal{X} \text{ for all sufficiently small } t > 0 \text{ and all } x \in \text{ri } \mathcal{X}\}. \quad (\text{D.30})$$

871 In words,  $\tilde{\mathcal{V}}$  is the smallest subspace of  $\mathcal{Y}$  which contains  $\mathcal{X}$  when the latter is translated to the origin  
 872 so, by construction,  $\mathcal{X}$  is full-dimensional when viewed as a subset of  $\tilde{\mathcal{V}}$ .<sup>6</sup> In this sense,  $\tilde{\mathcal{V}}$  contains  
 873 all the “essential” directions of motion of the problem.

874 Dually to the above, we also consider the corresponding dual space  $\tilde{\mathcal{Y}} \equiv \tilde{\mathcal{V}}^*$  of  $\tilde{\mathcal{V}}$ ; this is not a  
 875 subspace of  $\mathcal{Y}$ , but there exists a canonical surjection  $\Pi: \mathcal{Y} \twoheadrightarrow \tilde{\mathcal{Y}}$  defined by restricting the action of  
 876  $y \in \mathcal{Y}$  to  $\tilde{\mathcal{V}}$ , that is,

$$\langle \Pi(y), z \rangle = \langle y, z \rangle \quad \text{for all } z \in \tilde{\mathcal{V}}. \quad (\text{D.31})$$

877 The kernel of  $\Pi$  is precisely the annihilator  $\text{Ann}(\tilde{\mathcal{V}})$  of  $\tilde{\mathcal{V}}$ , i.e.,

$$\ker \Pi = \text{Ann}(\tilde{\mathcal{V}}) \equiv \{w \in \mathcal{Y} : \langle w, z \rangle = 0 \text{ for all } z \in \tilde{\mathcal{V}}\} \quad (\text{D.32})$$

878 so, by the first isomorphism theorem, we get a canonical identification  $(\mathcal{Y}/\tilde{\mathcal{V}})^* \cong \ker \Pi$ .

879 The main reason for descending from  $\mathcal{Y}$  to  $\tilde{\mathcal{Y}}$  is the following: in the original space  $\mathcal{Y}$ , we have  
 880  $Q(y + w) = Q(y)$  whenever  $w$  annihilates  $\tilde{\mathcal{V}}$ , cf. Proposition B.1. As a result, the inverse image of  
 881 any compact subset of  $\mathcal{X}$  under  $Q$  will always contain a copy of  $\text{Ann}(\tilde{\mathcal{V}})$ , so it can never be compact  
 882 itself. By contrast, by “modding out”  $\text{Ann}(\tilde{\mathcal{V}})$  and descending to the restricted space  $\tilde{\mathcal{Y}}$ , this is no  
 883 longer the case.

884 To move forward, consider the restricted mirror map  $\tilde{Q}: \tilde{\mathcal{Y}} \rightarrow \mathcal{X}$  given by

$$\tilde{Q}(\tilde{y}) = Q(y) \quad \text{whenever } \Pi(y) = \tilde{y}. \quad (\text{D.33})$$

885 By the last item of Proposition B.1 we have  $Q(y) = Q(y + w)$  whenever  $w \in \text{Ann}(\tilde{\mathcal{V}})$ ; this means  
 886 that the choice of representative in (D.33) does not matter, so  $\tilde{Q}$  is well-defined. Accordingly, letting

$$\tilde{Y}(t) = \Pi(Y(t)) \quad (\text{D.34})$$

887 and applying  $\Pi$  to (S-FTRL) yields the “restricted” dynamics

$$d\tilde{Y}(t) = d(\Pi \cdot Y(t)) = \Pi \cdot v(X(t)) dt + \Pi \cdot \sigma(X(t)) \cdot dW(t) \quad (\text{D.35})$$

888 where  $X(t) = Q(Y(t)) = \tilde{Q}(\tilde{Y}(t))$  and, in a slight abuse of notation, we are overloading the symbol  
 889  $\Pi$  to denote both the linear map  $\Pi: \mathcal{Y} \rightarrow \tilde{\mathcal{Y}}$  and its representation as a matrix. These dynamics  
 890 represent a time-homogeneous SDE in terms of  $\tilde{Y}$ , and they will be our main object of study in the  
 891 rest of our proof.

---

<sup>6</sup>Specifically, unless  $\mathcal{X}$  is a singleton, it has nonempty topological interior when viewed as a subset of  $\tilde{\mathcal{V}}$ .

892 **Step 3: Positive recurrence of the restricted process.** With all this in hand, positive recurrence  
 893 for the restricted process  $\tilde{Y}(t)$  boils down to the following: *a)* verifying that the infinitesimal generator  
 894 of  $\tilde{Y}$  is uniformly elliptic; and *b)* showing that the mean time required for  $\tilde{Y}(t)$  to reach some compact  
 895 set of  $\tilde{\mathcal{Y}}$  is finite.

896 We begin by establishing uniform ellipticity. In view of (D.35), the principal symbol (C.13) of the  
 897 infinitesimal generator of  $\tilde{Y}(t)$  is

$$A = (\Pi \cdot \sigma) \cdot (\Pi \cdot \sigma)^\top = \Pi \sigma \sigma^\top \Pi^\top = \Pi \Sigma \Pi^\top. \quad (\text{D.36})$$

898 Since  $\Sigma \succcurlyeq \sigma_{\min}^2 I$ , we readily get

$$A \succcurlyeq \sigma_{\min}^2 \Pi \Pi^\top \succcurlyeq \sigma_{\min}^2 \pi_{\min}^2 I \quad (\text{D.37})$$

899 with  $\sigma_{\min} > 0$  (by assumption) and  $\pi_{\min} := \lambda_{\min}(\Pi \Pi^\top) > 0$  (because  $\Pi$  is surjective, so it has full  
 900 rank). This shows that the principal symbol  $\Pi \Sigma \Pi^\top$  of the generator of  $\tilde{Y}$  is uniformly positive-definite,  
 901 so  $\tilde{Y}$  is itself uniformly elliptic.

902 For the second component of our proof of positive recurrence, recall that  $x^* \in \text{ri } \mathcal{X}$ , so there exists  
 903 some sufficiently small  $r > 0$  such that the (compact convex) set

$$\mathcal{K}_r := \mathbb{B}_r \cap \mathcal{X} = \{x \in \mathcal{X} : \|x - x^*\| \leq r\} \quad (\text{D.38})$$

904 lies in its entirety within  $\text{ri } \mathcal{X}$ . We then claim that the inverse image

$$\tilde{\mathcal{D}}_r := \tilde{Q}^{-1}(\mathcal{K}_r) = \{\tilde{y} \in \tilde{\mathcal{Y}} : \|\tilde{Q}(\tilde{y}) - x^*\| \leq r\} \quad (\text{D.39})$$

905 of  $\mathcal{K}_r$  under the restricted mirror map  $\tilde{Q}$  is compact. To see this, note first that  $\tilde{\mathcal{D}}_r = \partial h(\mathcal{K}_r)$  by  
 906 Proposition B.1.<sup>7</sup> Thus, given that  $\mathcal{K}_r$  is a convex body in  $\tilde{\mathcal{V}}$  that is entirely contained in the (relative)  
 907 interior of the prox-domain  $\mathcal{X}_h$  of  $h$  (because  $\text{ri } \mathcal{X} \subseteq \text{dom } \partial h \equiv \mathcal{X}_h$ ), it follows that  $\partial h(\mathcal{K}_r)$  is itself  
 908 compact by the upper hemicontinuity of  $\partial h$  [21, Remark 6.2.3].

909 To conclude, note that

$$\begin{aligned} \inf\{t > 0 : \tilde{Y}(t) \in \tilde{\mathcal{D}}_r\} &= \inf\{t > 0 : \|\tilde{Q}(\tilde{Y}(t)) - x^*\| \leq r\} \\ &= \inf\{t > 0 : \|Q(Y(t)) - x^*\| \leq r\} \\ &= \inf\{t > 0 : X(t) \in \mathbb{B}_r(x^*)\} \\ &= \tau_r \end{aligned} \quad (\text{D.40})$$

910 so it follows from (16) that  $\tilde{Y}(t)$  hits  $\tilde{\mathcal{D}}_r$  in finite time on average. Since  $\tilde{Y}(t)$  is uniformly elliptic,  
 911 Theorem C.1 shows that it is positive recurrent, as claimed.

912 **Step 4: Estimating the long-run occupation measure.** Since the restricted process  $\tilde{Y}(t)$  is a  
 913 positive recurrent Itô diffusion, standard results show that it admits an invariant distribution  $\tilde{\nu}$  on  $\tilde{\mathcal{Y}}$   
 914 which satisfies the law of large numbers

$$\lim_{t \rightarrow \infty} \frac{1}{t} \int_0^t f(\tilde{Y}(s)) ds = \int_{\tilde{\mathcal{Y}}} f d\tilde{\nu} \quad (\text{D.41})$$

915 for every  $\tilde{\nu}$ -integrable test function  $f$  on  $\tilde{\mathcal{Y}}$ . Thus, letting  $\nu = \tilde{Q}_* \tilde{\nu} \equiv \tilde{\nu} \circ \tilde{Q}^{-1}$  denote the corresponding  
 916 push-forward measure on  $\mathcal{X}$ , we get

$$\begin{aligned} \lim_{t \rightarrow \infty} \mu_t(\mathbb{B}_r) &= \lim_{t \rightarrow \infty} \frac{1}{t} \int_0^t \mathbb{1}\{X(s) \in \mathbb{B}_r\} ds \\ &= \lim_{t \rightarrow \infty} \frac{1}{t} \int_0^t \mathbb{1}\{\tilde{Q}(\tilde{Y}(s)) \in \mathbb{B}_r\} ds \\ &= \lim_{t \rightarrow \infty} \frac{1}{t} \int_0^t \mathbb{1}\{\tilde{Y}(s) \in \tilde{\mathcal{D}}_r\} ds \\ &= \int_{\tilde{\mathcal{Y}}} \mathbb{1}\{\tilde{y} \in \tilde{\mathcal{D}}_r\} d\tilde{\nu}(\tilde{y}) \end{aligned}$$

<sup>7</sup>Strictly speaking, we are viewing here  $\partial h$  as taking values in  $\tilde{\mathcal{Y}}$  instead of  $\mathcal{Y}$ ; this is a simple matter of identifying  $h: \mathcal{V} \rightarrow \mathbb{R}$  with its canonical restriction to  $\tilde{\mathcal{V}} \subseteq \mathcal{V}$ .

$$= \tilde{v}(\tilde{D}_r). \quad (\text{D.42})$$

917 In a similar manner, we also get

$$\begin{aligned} 1 - \tilde{v}(\tilde{D}_r) &= \lim_{t \rightarrow \infty} \frac{1}{t} \mathbb{E} \left[ \int_0^t \mathbb{1}\{X(s) \notin \mathbb{B}_r\} ds \right] && \# \text{ b/c } \lim_{t \rightarrow \infty} \mu_t \text{ is deterministic} \\ &\leq \lim_{t \rightarrow \infty} \frac{1}{t} \mathbb{E} \left[ \int_0^t \frac{\|X(s) - x^*\|^2}{r^2} ds \right] && \# \text{ b/c } \frac{\|X(s) - x^*\|^2}{r^2} \geq 1 \text{ outside } \mathbb{B}_r \\ &\leq \lim_{t \rightarrow \infty} \frac{1}{r^2} \left[ \frac{F_0}{\alpha t} + \frac{\sigma_{\max}^2}{2\alpha K} \right] && \# \text{ by (D.25)} \\ &= \frac{r_{\sigma}^2}{r^2}. \end{aligned} \quad (\text{D.43})$$

918 Our claim then follows by combining Eqs. (D.42) and (D.43).  $\blacksquare$

## 919 E Analysis and results in discrete time

920 In this appendix, we proceed to prove the discrete-time results presented in Section 4.

921 **E.1. The null-monotone case.** We begin with our analysis for null-monotone games. For  
922 convenience, we restate Theorem 3 below:

923 **Theorem 3** (Null-monotone games). *Suppose that (FTRL) is run in a null-monotone game  $\mathcal{G}$  with a  
924 strongly convex  $h^*$ , let  $x^*$  be an equilibrium of  $\mathcal{G}$ , and let  $F_t = F(x^*, Y_t)$ . Then  $\lim_{t \rightarrow \infty} \mathbb{E}[F_t] = \infty$ .*

925 *Proof.* By a second-order Taylor expansion with Lagrange remainder, there exists  $w_t \in [Y_t, Y_{t+1}]$   
926 such that:

$$F_{t+1} = F_t + \gamma \langle \hat{v}_t, X_t - x^* \rangle + \frac{\gamma^2}{2} \hat{v}_t^\top \nabla^2 h^*(w_t) \hat{v}_t. \quad (\text{E.1})$$

927 Since  $\mathcal{G}$  is null-monotone, we have  $\langle v(X_t), X_t - x^* \rangle = 0$  by assumption, and thus

$$F_{t+1} = F_t + \gamma \langle U_t, X_t - x^* \rangle + \frac{\gamma^2}{2} \hat{v}_t^\top \nabla^2 h^*(w_t) \hat{v}_t \quad (\text{E.2})$$

$$\geq F_t + \gamma \langle U_t, X_t - x^* \rangle + \frac{m}{2} \gamma^2 \|\hat{v}_t\|_*^2 \quad (\text{E.3})$$

928 where  $m$  denotes here the strong convexity modulus of  $h^*$ . Moving forward, note that  
929 (i)  $\mathbb{E}[\langle U_t, X_t - x^* \rangle] = \mathbb{E}[\langle \mathbb{E}[U_t | \mathcal{F}_t], X_t - x^* \rangle] = 0$ ; and (ii)  $\inf_t \mathbb{E}[\|\hat{v}_t\|_*^2] \geq \inf \mathbb{E}[\|V(x; \omega)\|_*^2] > 0$ ,  
930 so there exists some  $V_* > 0$  such that  $\mathbb{E}[\|\hat{v}_t\|_*^2] \geq V_*^2$  for all  $t$ . We thus get

$$\begin{aligned} \mathbb{E}[F_{t+1}] &\geq \mathbb{E}[F_t] + \frac{m}{2} \gamma^2 \mathbb{E}[\|\hat{v}_t\|_*^2] \\ &\geq \mathbb{E}[F_t] + m \gamma^2 V_*^2 / 2 \\ &\geq F_0 + m \gamma^2 V_*^2 t / 2 \end{aligned} \quad (\text{E.4})$$

931 Our result then follows by taking the limit  $t \rightarrow \infty$ .  $\blacksquare$

932 **E.2. The strongly monotone case.** We now turn to our main result for strongly monotone games,  
933 which we restate below for convenience.

934 **Theorem 4** (Strongly monotone games). *Suppose that (FTRL) is run in an  $\alpha$ -strongly monotone  
935 game  $\mathcal{G}$ , let  $r_\sigma := \sqrt{\gamma(\sigma^2 + \beta^2)/(\alpha K)}$ , and consider the hitting time  $\tau_r := \inf\{t > 0 : X_t \in \mathbb{B}_r(x^*)\}$   
936 for a ball  $\mathbb{B}_r(x^*) = \{x : \|x - x^*\| \leq r\}$  of radius  $r$  centered on the (necessarily unique) equilibrium  
937  $x^*$  of  $\mathcal{G}$ . Then, for all  $r > r_\sigma$ , we have*

$$\mathbb{E}[\tau_r] \leq \frac{1}{\alpha \gamma (r^2 - r_\sigma^2)} \times \begin{cases} F_0 & \text{if } X_0 \notin \mathbb{B}_r(x^*), \\ F_0 + \alpha \gamma r^2 & \text{if } X_0 \in \mathbb{B}_r(x^*), \end{cases} \quad (21)$$

where  $F_0 = F(x^*, Y_0)$ . If, in addition,  $x^*$  is interior,  $X_t$  admits a unique invariant distribution to which it converges in total variation, and we have

$$\lim_{t \rightarrow \infty} \frac{1}{t} \mathbb{E} \left[ \sum_{s=0}^t \mathbb{1}\{X_s \in \mathbb{B}_r(x^*)\} \right] \geq 1 - r_\sigma^2 / r^2 \quad (22)$$

for all  $r > r_\sigma$  such that  $\mathbb{B}_r(x^*) \subseteq \text{ri } \mathcal{X}$ .

*Proof.* The main theme of our proof shadows the continuous-time analysis, but it requires distinct tools and techniques to address the specific challenges that arise in the discrete-time Markov chain setting (where, among others, the main tools of stochastic calculus cannot be applied). To streamline our presentation, we follow a step-by-step approach, as outlined below.

**Step 1: Deriving a hitting estimate.** Due to measurability issues, we cannot apply Dynkin's lemma directly in the discrete-time setting, which makes the proof more involved. Moreover, unlike in the continuous-time regime, we need to distinguish between different initializations. Specifically, we consider two cases depending on whether the initial state  $X_0$  lies within the ball  $\mathbb{B}_r(x^*)$  or not.

• *Case 1:*  $X_0 \notin \mathbb{B}_r(x^*)$ .

Letting  $F_t := F(x^*, Y_t)$  and unfolding (B.29b), we readily obtain:

$$F_t \leq F_0 + \gamma \sum_{s=0}^{t-1} \langle \hat{v}_s, X_s - x^* \rangle + \frac{\gamma^2}{2K} \sum_{s=0}^{t-1} \|\hat{v}_s\|_*^2 \quad (E.5)$$

and, setting  $t \leftarrow \tau_r \wedge t$ , we get:

$$F_{\tau_r \wedge t} \leq F_0 + \gamma \sum_{s=0}^{(\tau_r \wedge t)-1} \langle \hat{v}_s, X_s - x^* \rangle + \frac{\gamma^2}{2K} \sum_{s=0}^{(\tau_r \wedge t)-1} \|\hat{v}_s\|_*^2 \quad (E.6)$$

Thus, taking expectation conditional on the initial state  $Y_0 = y$ , we have

$$\begin{aligned} \mathbb{E}[F_{\tau_r \wedge t}] &\leq F_0 + \gamma \mathbb{E} \left[ \sum_{s=0}^{(\tau_r \wedge t)-1} \langle \hat{v}_s, X_s - x^* \rangle \right] + \frac{\gamma^2}{2K} \mathbb{E} \left[ \sum_{s=0}^{(\tau_r \wedge t)-1} \|\hat{v}_s\|_*^2 \right] \\ &\leq F_0 + \sum_{s=0}^{t-1} \mathbb{E} \left[ \left( \gamma \langle \hat{v}_s, X_s - x^* \rangle + \frac{\gamma^2}{2K} \|\hat{v}_s\|_*^2 \right) \mathbb{1}(\tau_r \geq s+1) \right] \end{aligned} \quad (E.7)$$

For notational convenience, we denote each summand above per

$$D_s := \mathbb{E} \left[ \left( \gamma \langle \hat{v}_s, X_s - x^* \rangle + \frac{\gamma^2}{2K} \|\hat{v}_s\|_*^2 \right) \mathbb{1}(\tau_r \geq s+1) \right]$$

and noting that the random variable  $\mathbb{1}(\tau_r \geq s+1)$  is  $\mathcal{F}_s$ -measurable, we get

$$\begin{aligned} D_s &= \mathbb{E} \left[ \mathbb{E} \left[ \left( \gamma \langle \hat{v}_s, X_s - x^* \rangle + \frac{\gamma^2}{2K} \|\hat{v}_s\|_*^2 \right) \mathbb{1}(\tau_r \geq s+1) \mid \mathcal{F}_s \right] \right] \\ &= \mathbb{E} \left[ \mathbb{1}(\tau_r \geq s+1) \mathbb{E} \left[ \gamma \langle \hat{v}_s, X_s - x^* \rangle + \frac{\gamma^2}{2K} \|\hat{v}_s\|_*^2 \mid \mathcal{F}_s \right] \right] \\ &= \mathbb{E} \left[ \mathbb{1}(\tau_r \geq s+1) \left( \gamma \langle v(X_s), X_s - x^* \rangle + \frac{\gamma^2}{2K} \mathbb{E}[\|\hat{v}_s\|_*^2 \mid \mathcal{F}_s] \right) \right] \\ &= \mathbb{E} \left[ \mathbb{1}(\tau_r \geq s+1) \left( -\gamma \alpha \|X_s - x^*\|^2 + \frac{\gamma^2}{2K} \mathbb{E}[\|\hat{v}_s\|_*^2 \mid \mathcal{F}_s] \right) \right] \end{aligned} \quad (E.8)$$

where we used that  $\mathbb{E}[U(X_s, \omega_s) \mid \mathcal{F}_s] = 0$ . At this point, we note that  $\mathbb{E}[\|\hat{v}_s\|_*^2 \mid \mathcal{F}_s] \leq 2 \mathbb{E}[\|v(X_s)\|_*^2 + \|U(X_s, \omega_s)\|_*^2 \mid \mathcal{F}_s] \leq 2(\beta^2 + \sigma^2)$ , and since  $r_\sigma^2 \equiv \gamma(\beta^2 + \sigma^2)/(\alpha K)$ , we get

$$\begin{aligned} D_s &\leq \mathbb{E} \left[ \left( -\gamma \alpha \|X_s - x^*\|^2 + \alpha \gamma r_\sigma^2 \right) \mathbb{1}(\tau_r \geq s+1) \right] \\ &\leq \mathbb{E} \left[ \left( -\gamma \alpha r^2 + \alpha \gamma r_\sigma^2 \right) \mathbb{1}(\tau_r \geq s+1) \right] \end{aligned} \quad (E.9)$$



where in the last step we used that  $\|X_s - x^*\| \geq r^2$  on  $\{\tau_r \geq s + 1\}$ . Thus, plugging the above bound into (E.7), we obtain

$$\begin{aligned} \mathbb{E}[F_{\tau_r \wedge t}] &\leq F_0 + \sum_{s=0}^{t-1} D_s \leq F_0 + \sum_{s=0}^{t-1} \mathbb{E}\left[\left(-\gamma\alpha r^2 + \alpha\gamma r_\sigma^2\right) \mathbb{1}(\tau_r \geq s + 1)\right] \\ &= F_0 - \alpha\gamma(r^2 - r_\sigma^2) \mathbb{E}\left[\sum_{s=0}^{(\tau_r \wedge t)-1} 1\right] \\ &= F_0 - \alpha\gamma(r^2 - r_\sigma^2) \mathbb{E}[(\tau_r \wedge t)] \end{aligned} \quad (\text{E.10})$$

As  $F$  is nonnegative, we readily obtain that

$$\alpha\gamma(r^2 - r_\sigma^2) \mathbb{E}[(\tau_r \wedge t)] \leq F_0 \quad (\text{E.11})$$

and, since  $r_\sigma < r$ , we get:

$$\mathbb{E}[(\tau_r \wedge t)] \leq \frac{1}{\alpha\gamma(r^2 - r_\sigma^2)} F_0 \quad (\text{E.12})$$

Finally, taking  $t \rightarrow \infty$ , and invoking the monotone convergence theorem [16], we get

$$\mathbb{E}[\tau_r] \leq \frac{1}{\alpha\gamma(r^2 - r_\sigma^2)} F_0 \quad (\text{E.13})$$

• *Case 2:*  $X_0 \in \mathbb{B}_r(x^*)$ . In this case, we have:

$$\begin{aligned} \mathbb{E}[\tau_r] &= \mathbb{E}[\mathbb{1}(Q(Y_1) \in \mathbb{B}_r(x^*)) + \mathbb{1}(Q(Y_1) \notin \mathbb{B}_r(x^*))\tau_r] \\ &= \mathbb{P}(Q(Y_1) \in \mathbb{B}_r(x^*)) + \mathbb{E}[\mathbb{1}(Q(Y_1) \notin \mathbb{B}_r(x^*)) (1 + \mathbb{E}_{Y_1}[\tau_r])] \\ &= \mathbb{P}(Q(Y_1) \in \mathbb{B}_r(x^*)) + \mathbb{P}(Q(Y_1) \notin \mathbb{B}_r(x^*)) + \mathbb{E}[\mathbb{1}(Q(Y_1) \notin \mathbb{B}_r(x^*)) \mathbb{E}_{Y_1}[\tau_r]] \\ &= 1 + \mathbb{E}[\mathbb{1}(Q(Y_1) \notin \mathbb{B}_r(x^*)) \mathbb{E}_{Y_1}[\tau_r]] \\ &\leq 1 + \mathbb{E}\left[\mathbb{1}(Q(Y_1) \notin \mathbb{B}_r(x^*)) \left(\alpha\gamma(r^2 - r_\sigma^2)\right)^{-1} F(x^*, Y_1)\right] \\ &\leq 1 + \left(\alpha\gamma(r^2 - r_\sigma^2)\right)^{-1} \mathbb{E}[F(x^*, Y_1)] \\ &\leq 1 + \left(\alpha\gamma(r^2 - r_\sigma^2)\right)^{-1} \mathbb{E}\left[F_0 + \gamma\langle \hat{v}_0, X_0 - x^* \rangle + \frac{\gamma^2}{2K} \|\hat{v}_0\|_*^2\right] \\ &\leq 1 + \left(\alpha\gamma(r^2 - r_\sigma^2)\right)^{-1} \left(F_0 + \gamma\langle v(X_0), X_0 - x^* \rangle + \alpha\gamma r_\sigma^2\right) \\ &\leq 1 + \left(\alpha\gamma(r^2 - r_\sigma^2)\right)^{-1} \left(F_0 - \gamma\alpha\|X_0 - x^*\|^2 + \alpha\gamma r_\sigma^2\right) \\ &\leq 1 + \left(\alpha\gamma(r^2 - r_\sigma^2)\right)^{-1} \left(F_0 + \alpha\gamma r_\sigma^2\right) \\ &= \frac{F_0 + \alpha\gamma r^2}{\alpha\gamma(r^2 - r_\sigma^2)} \end{aligned} \quad (\text{E.14})$$

Thus, collectively, we get:

$$\mathbb{E}[\tau_r] \leq \frac{1}{\alpha\gamma(r^2 - r_\sigma^2)} \times \begin{cases} F_0 & \text{if } X_0 \notin \mathbb{B}_r(x^*), \\ F_0 + \alpha\gamma r^2 & \text{if } X_0 \in \mathbb{B}_r(x^*), \end{cases} \quad (\text{E.15})$$

**Step 2: Descending to the restricted process.** As in the continuous-time case, establishing positive recurrence requires analyzing a “restricted” version of the process. To that end, we follow the same construction as in *Step 2 of Theorem 2*, and we define the canonical surjection  $\Pi: \mathcal{Y} \rightarrow \tilde{\mathcal{Y}}$  by restricting the action of  $y \in \mathcal{Y}$  to  $\tilde{\mathcal{V}}$ , that is,

$$\langle \Pi(y), z \rangle = \langle y, z \rangle \quad \text{for all } z \in \tilde{\mathcal{V}}. \quad (\text{E.16})$$

whose kernel of  $\Pi$  is precisely the *annihilator*  $\text{Ann}(\tilde{\mathcal{V}})$  of  $\tilde{\mathcal{V}}$ , i.e.,

$$\ker \Pi = \text{Ann}(\tilde{\mathcal{V}}) = \{y \in \mathcal{Y} : \langle y, z \rangle = 0 \text{ for all } z \in \tilde{\mathcal{V}}\} \quad (\text{E.17})$$

968 In addition, we consider the *restricted mirror map*  $\tilde{Q}: \tilde{\mathcal{Y}} \rightarrow \mathcal{X}$  given by

$$\tilde{Q}(\tilde{y}) = Q(y) \quad \text{whenever } \Pi(y) = \tilde{y}. \quad (\text{E.18})$$

969 Accordingly, letting

$$\tilde{Y}_t = \Pi(Y_t) \quad (\text{E.19})$$

970 and applying  $\Pi$  to (FTRL) yields the “restricted” process

$$\tilde{Y}_{t+1} = \Pi \cdot Y_{t+1} = \Pi \cdot Y_t + \gamma(\Pi \cdot v(X_t) + \Pi \cdot U_t) = \tilde{Y}_t + \gamma(\tilde{v}(X_t) + \tilde{U}_t) \quad (\text{E.20})$$

971 where  $X_t = Q(Y_t) = \tilde{Q}(\tilde{Y}_t)$  and, in a slight abuse of notation, we are overloading the symbol  $\Pi$  to  
972 denote both the linear map  $\Pi: \mathcal{Y} \rightarrow \tilde{\mathcal{Y}}$  and its representation as a matrix. Finally, writing  $\tilde{Y}$  as

$$\tilde{Y}_{t+1} = \tilde{Y}_t + \gamma \tilde{v}(\tilde{Q}(\tilde{Y}_t)) + \gamma U(\tilde{Q}(\tilde{Y}_t), \omega_t) \quad (\text{E.21})$$

973 we conclude that it is a time-homogeneous Markov process, and we denote its kernel by  $\tilde{q}$ , where for  
974 any  $\tilde{y} \in \tilde{\mathcal{Y}}$  and Borel set  $\mathcal{A} \subseteq \tilde{\mathcal{Y}}$ , we have  $\tilde{q}(\tilde{y}, \mathcal{A}) = \mathbb{P}(\tilde{Y}_{t+1} \in \mathcal{A} \mid \tilde{Y}_t = \tilde{y})$ .

975 **Step 3: Recurrence of the restricted process.** To establish the recurrence of the restricted process,  
976 we first need to understand the effect of  $\Pi$  on the distribution of  $U(x)$ . As stated in the assumptions  
977 in Section 4, the probability distribution  $\nu_x$  of  $U(x)$  decomposes as  $\nu_x = \nu_x^c + \nu_x^\perp$ . Noting the  
978 push-forward measure is linear, we readily obtain that  $\Pi_* \nu_x = \Pi_* \nu_x^c + \Pi_* \nu_x^\perp$ , where  $\Pi_* \nu_x$  denotes the  
979 push-forward measure  $\mathcal{A} \mapsto (\nu_x \circ \Pi^{-1})(\mathcal{A})$ . For notational convenience, we denote  $\hat{\mathcal{Y}} \equiv \text{Ann}(\tilde{\mathcal{V}})$   
980 and  $p(x, y) \equiv p_x(y)$ . Then, each  $y \in \mathcal{Y}$  can be decomposed as  $y = \tilde{y} + \hat{y}$ , and since  $\Pi$  has full  
981 column-rank, the measure  $\Pi_* \nu_x^c$  has density with respect to the Lebesgue measure  $\lambda_{\tilde{\mathcal{Y}}}$  on  $\tilde{\mathcal{Y}}$ , given by

$$\tilde{p}(x, \tilde{y}) = \int_{\hat{\mathcal{Y}}} p(x, \tilde{y}, \hat{y}) d\lambda_{\hat{\mathcal{Y}}}(\hat{y}) \quad (\text{E.22})$$

982 where  $\lambda_{\hat{\mathcal{Y}}}$  is the Lebesgue measure on  $\hat{\mathcal{Y}}$ . Importantly, the density  $\tilde{p}$  satisfies the following properties,  
983 which will be crucial for establishing the recurrence of the process. We formalize these in the  
984 proposition below, whose proof is deferred until after the theorem.

985 **Proposition E.1.** *Let the function  $\tilde{p}$  as defined in (E.22). Then:*

- 986 (i) *For any compact set  $\mathcal{K} \subseteq \mathcal{X}$  and every  $\tilde{y} \in \tilde{\mathcal{Y}}$ , it holds  $\inf_{x \in \mathcal{K}} \tilde{p}(x, \tilde{y}) > 0$ .*
- 987 (ii) *The function  $\tilde{p}$  is (jointly) lower semi-continuous.*

988 **Lebesgue irreducibility.** We now show that the restricted process  $\tilde{Y}_t$  is Lebesgue irreducible; that  
989 is, starting from any point in its domain, the process has a positive probability of reaching any open  
990 set with nonzero Lebesgue measure. This property is crucial for establishing recurrence, as it ensures  
991 that the process does not avoid regions of the space indefinitely.

992 For this, let a Borel measurable set  $\mathcal{A} \subseteq \tilde{\mathcal{Y}}$  with  $\lambda_{\tilde{\mathcal{Y}}}(\mathcal{A}) > 0$ . We will show that  $\tilde{q}(\tilde{y}, \mathcal{A}) > 0$  for all  
993  $\tilde{y} \in \tilde{\mathcal{Y}}$ , which implies that  $\mathcal{A}$  can be reached from any state  $\tilde{y}$  in one step with positive probability.

$$\begin{aligned} \tilde{q}(\tilde{y}, \mathcal{A}) &= \mathbb{P}(\tilde{Y}_{t+1} \in \mathcal{A} \mid \tilde{Y}_t = \tilde{y}) \\ &= \mathbb{P}(\tilde{y} + \gamma \tilde{v}(\tilde{Q}(\tilde{y})) + \gamma \tilde{U}(\tilde{Q}(\tilde{y}), \omega) \in \mathcal{A}) \\ &= \mathbb{P}(\tilde{U}(\tilde{Q}(\tilde{y}), \omega) \in \{\gamma^{-1} \mathcal{A} - \gamma^{-1} \tilde{y} - \tilde{v}(\tilde{Q}(\tilde{y}))\}) \\ &= \mathbb{P}(\tilde{U}(\tilde{Q}(\tilde{y}), \omega) \in \mathcal{A}_{\tilde{y}}) \\ &\geq \int_{\mathcal{A}_{\tilde{y}}} \tilde{p}(\tilde{Q}(\tilde{y}), z) d\lambda_{\tilde{\mathcal{Y}}}(z) \end{aligned} \quad (\text{E.23})$$

994 where  $\mathcal{A}_{\tilde{y}} \equiv \gamma^{-1} \mathcal{A} - \gamma^{-1} \tilde{y} - \tilde{v}(\tilde{Q}(\tilde{y}))$  with  $\lambda_{\tilde{\mathcal{Y}}}(\mathcal{A}_{\tilde{y}}) = \gamma^{-d} \lambda_{\tilde{\mathcal{Y}}}(\mathcal{A}) > 0$ . Finally, since  $\tilde{p}(\tilde{Q}(\tilde{y}), \cdot)$   
995 strictly positive, we conclude that  $\tilde{q}(\tilde{y}, \mathcal{A}) > 0$ , which shows that  $\tilde{Y}_t$  induced by (E.20) is Lebesgue-  
996 irreducible.

997 **Harris recurrence.** Our next step is to show that  $\tilde{Y}_t$  is Harris recurrent. This means that the process  
 998 returns to every set of positive Lebesgue measure infinitely often with probability one. Establishing  
 999 Harris recurrence is a key step toward proving ergodicity, as it ensures that the process does not drift  
 1000 away or get trapped. For this, we will show that  $\tilde{\mathcal{D}}_r = \{\tilde{y} \in \tilde{\mathcal{Y}} : \|\tilde{Q}(\tilde{y}) - x^*\| \leq r\}$  is a recurrent set  
 1001 from which we can go “everywhere” with positive probability. Importantly, the set  $\tilde{\mathcal{D}}_r$  is compact as  
 1002 shown in *Step 3 of Theorem 2*.

1003 The first part to prove Harris recurrence is immediate from *Step 1* of our proof; namely, since  
 1004  $\mathbb{E}_{\tilde{y}}[\tau_r] < \infty$  for any initial condition  $\tilde{y} \in \tilde{\mathcal{Y}}$ , we readily get that  $\mathbb{P}_{\tilde{y}}(\tau_r < \infty) = 1$ .

1005 For the second part, we will prove the so-called minorization property; that is, there exists a nontrivial  
 1006 measure  $\mu$  and a constant  $\alpha > 0$  such that

$$\tilde{q}(\tilde{y}, \mathcal{A}) \geq \alpha \mu(\mathcal{A}) \quad \text{for all } \tilde{y} \in \tilde{\mathcal{D}}_r \text{ and Borel sets } \mathcal{A} \subseteq \tilde{\mathcal{Y}}. \quad (\text{E.24})$$

1007 This condition implies that, from any point in  $\tilde{\mathcal{D}}_r$ , the process has a uniformly lower-bounded  
 1008 probability of reaching any set  $\mathcal{A}$  in one step according to the reference measure  $\mu$ .

1009 To establish the minorization condition (E.24), we define for notational convenience the function  
 1010  $f : \tilde{\mathcal{Y}} \times \tilde{\mathcal{Y}} \rightarrow \mathcal{X}_h \times \tilde{\mathcal{Y}}$  as

$$f(\tilde{y}, z) = \left( \tilde{Q}(\tilde{y}), \gamma^{-1}(z - \tilde{y}) - \tilde{v}(\tilde{Q}(\tilde{y})) \right) \quad (\text{E.25})$$

1011 which is continuous as a composition of continuous functions. With this definition in hand, we  
 1012 perform the change of variables in (E.23), and we have:

$$\begin{aligned} \tilde{q}(\tilde{y}, \mathcal{A}) &\geq \gamma^{-d} \int_{\mathcal{A}} \tilde{p}(f(\tilde{y}, z)) d\lambda_{\tilde{\mathcal{Y}}}(z) \\ &\geq \gamma^{-d} \int_{\mathcal{A}} \inf_{\tilde{y} \in \tilde{\mathcal{D}}_r} \tilde{p}(f(\tilde{y}, z)) d\lambda_{\tilde{\mathcal{Y}}}(z) \end{aligned} \quad (\text{E.26})$$

1013 To finally construct the measure  $\mu$ , we need to ensure that

$$0 < \int_{\tilde{\mathcal{Y}}} \inf_{\tilde{y} \in \tilde{\mathcal{D}}_r} \tilde{p}(f(\tilde{y}, z)) d\lambda_{\tilde{\mathcal{Y}}}(z) < \infty \quad (\text{E.27})$$

1014 To this end, we state the following proposition, whose proof is deferred until after the theorem to  
 1015 maintain the flow.

1016 **Proposition E.2.** *The density  $\tilde{p}$  satisfies:*

$$0 < \int_{\tilde{\mathcal{Y}}} \inf_{\tilde{y} \in \tilde{\mathcal{D}}_r} \tilde{p}(f(\tilde{y}, z)) d\lambda_{\tilde{\mathcal{Y}}}(z) < \infty \quad (\text{E.28})$$

1017 With Proposition E.1 in hand, we define the measure  $\mu$  as

$$\mu(\mathcal{A}) := \frac{\int_{\mathcal{A}} \inf_{\tilde{y} \in \tilde{\mathcal{D}}_r} \tilde{p}(f(\tilde{y}, z)) d\lambda_{\tilde{\mathcal{Y}}}(z)}{\int_{\tilde{\mathcal{Y}}} \inf_{\tilde{y} \in \tilde{\mathcal{D}}_r} \tilde{p}(f(\tilde{y}, z)) d\lambda_{\tilde{\mathcal{Y}}}(z)} \quad \text{for all Borel } \mathcal{A} \subseteq \tilde{\mathcal{Y}}. \quad (\text{E.29})$$

1018 Therefore, (E.26) becomes:

$$\tilde{q}(\tilde{y}, \mathcal{A}) \geq \gamma^{-d} \int_{\mathcal{A}} \inf_{\tilde{y} \in \tilde{\mathcal{D}}_r} \tilde{p}(f(\tilde{y}, z)) d\lambda_{\tilde{\mathcal{Y}}}(z) = \gamma^{-d} \int_{\tilde{\mathcal{Y}}} \inf_{\tilde{y} \in \tilde{\mathcal{D}}_r} \tilde{p}(f(\tilde{y}, z)) d\lambda_{\tilde{\mathcal{Y}}}(z) \cdot \mu(\mathcal{A}) \quad (\text{E.30})$$

1019 Thus, setting  $\alpha \equiv \gamma^{-d} \int_{\tilde{\mathcal{Y}}} \inf_{\tilde{y} \in \tilde{\mathcal{D}}_r} \tilde{p}(f(\tilde{y}, z)) d\lambda_{\tilde{\mathcal{Y}}}(z)$ , we conclude the minorization condition (E.24).

1020 Therefore, the set  $\tilde{\mathcal{D}}_r$  is recurrent and  $\mu(\tilde{\mathcal{D}}_r) > 0$  (since  $\lambda_{\tilde{\mathcal{Y}}}(\tilde{\mathcal{D}}_r) > 0$ ), and thus by [14, Proposi-  
 1021 tion 11.2.1] the Markov process  $\tilde{Y}_t$  admits an invariant measure. In addition, based on the equivalence  
 1022 (D.40) the expected return time  $\mathbb{E}[\tau_r]$  to  $\tilde{\mathcal{D}}_r$  is uniformly bounded for all initial conditions  $\tilde{y}$  on  
 1023  $\tilde{\mathcal{D}}_r$ , due to the continuity of the Fenchel coupling  $F$ . Therefore, invoking [47, Theorem 13.0.1],  
 1024 we conclude that the process  $\tilde{Y}_t$  admits a unique invariant probability measure  $\tilde{\nu}$ , and the law of  $\tilde{Y}_t$   
 1025 converges to  $\tilde{\nu}$  in total variation for every initial condition  $\tilde{y} \in \tilde{\mathcal{Y}}$ .

1026 **Step 4: Estimating the long-run occupation measure.** Finally, for the last part, letting  
 1027  $F_t := F(x^*, Y_t)$  and unfolding (B.29b), we obtain:

$$F_t \leq F_0 + \gamma \sum_{s=0}^{t-1} \langle \hat{v}_s, X_s - x^* \rangle + \frac{\gamma^2}{2K} \sum_{s=0}^{t-1} \|\hat{v}_s\|_*^2 \quad (\text{E.31})$$

1028 Taking expectations in both sides, we readily get

$$\begin{aligned} 0 \leq \mathbb{E}[F_t] &\leq \mathbb{E} \left[ F_0 + \gamma \sum_{s=0}^{t-1} \langle \hat{v}_s, X_s - x^* \rangle + \frac{\gamma^2}{2K} \sum_{s=0}^{t-1} \|\hat{v}_s\|_*^2 \right] \\ &\leq F_0 - \alpha\gamma \mathbb{E} \left[ \sum_{s=0}^{t-1} \|X_s - x^*\|^2 \right] + t\alpha\gamma r_\sigma^2 \end{aligned} \quad (\text{E.32})$$

1029 Therefore, by rearranging terms and dividing both sides by  $t$ , we have:

$$\frac{1}{t} \mathbb{E} \left[ \sum_{s=0}^{t-1} \|X_s - x^*\|^2 \right] \leq \frac{1}{\alpha\gamma t} F_0 + r_\sigma^2 \quad (\text{E.33})$$

1030 Moreover, we have:

$$\frac{1}{t} \mathbb{E} \left[ \sum_{s=0}^{t-1} \mathbb{1}\{X_s \notin \mathbb{B}_r(x^*)\} \right] \leq \frac{1}{r^2 t} \mathbb{E} \left[ \sum_{s=0}^{t-1} \|X_s - x^*\|^2 \right] \leq \frac{1}{\alpha\gamma t r^2} F_0 + \frac{r_\sigma^2}{r^2} \quad (\text{E.34})$$

1031 Now, note that  $\{X_s \notin \mathbb{B}_r(x^*)\} \equiv \{\tilde{Y}_t \notin \tilde{\mathcal{D}}_r\}$  by construction, and thus

$$\frac{1}{t} \mathbb{E} \left[ \sum_{s=0}^{t-1} \mathbb{1}\{X_s \notin \mathbb{B}_r(x^*)\} \right] = \frac{1}{t} \mathbb{E} \left[ \sum_{s=0}^{t-1} \mathbb{1}\{\tilde{Y}_t \notin \tilde{\mathcal{D}}_r\} \right] \quad (\text{E.35})$$

1032 Taking  $t \rightarrow \infty$ , and invoking Birkhoff's individual ergodic theorem [20, Theorem 2.3.4], we readily  
 1033 get that the mean occupation measure  $\mathcal{A} \mapsto t^{-1} \mathbb{E} \left[ \sum_{s=0}^{t-1} \mathbb{1}\{\tilde{Y}_t \in \mathcal{A}\} \right]$  converges strongly to the  
 1034 invariant measure  $\tilde{\nu}$ , and therefore

$$\lim_{t \rightarrow \infty} \frac{1}{t} \mathbb{E} \left[ \sum_{s=0}^{t-1} \mathbb{1}\{X_s \notin \mathbb{B}_r(x^*)\} \right] = \lim_{t \rightarrow \infty} \frac{1}{t} \mathbb{E} \left[ \sum_{s=0}^{t-1} \mathbb{1}\{\tilde{Y}_t \notin \tilde{\mathcal{D}}_r\} \right] = 1 - \tilde{\nu}(\tilde{\mathcal{D}}_r) \quad (\text{E.36})$$

1035 and, using (E.34), we have:

$$\tilde{\nu}(\tilde{\mathcal{D}}_r) \geq 1 - \frac{r_\sigma^2}{r^2} \quad (\text{E.37})$$

1036 and our proof is complete.  $\blacksquare$

1037 To keep the presentation self-contained, we restate and prove Proposition E.1 and Proposition E.2  
 1038 below.

1039 **Proposition E.1.** *Let the function  $\tilde{p}$  as defined in (E.22). Then:*

- 1040 (i) *For any compact set  $\mathcal{K} \subseteq \mathcal{X}$  and every  $\tilde{y} \in \tilde{\mathcal{Y}}$ , it holds  $\inf_{x \in \mathcal{K}} \tilde{p}(x, \tilde{y}) > 0$ .*
- 1041 (ii) *The function  $\tilde{p}$  is (jointly) lower semi-continuous.*

1042 *Proof.* (i) For the first part, let  $\tilde{y} \in \tilde{\mathcal{Y}}$ . Then

$$\inf_{x \in \mathcal{K}} \tilde{p}(x, \tilde{y}) = \inf_{x \in \mathcal{K}} \int_{\tilde{\mathcal{Y}}} p(x, \tilde{y}, \hat{y}) d\lambda_{\tilde{\mathcal{Y}}}(\hat{y}) \geq \int_{\tilde{\mathcal{Y}}} \inf_{x \in \mathcal{K}} p(x, \tilde{y}, \hat{y}) d\lambda_{\tilde{\mathcal{Y}}}(\hat{y}) > 0 \quad (\text{E.38})$$

- 1043 (ii) For the second part, let  $(x, \tilde{y}) \in \mathcal{X} \times \tilde{\mathcal{Y}}$ , and let a sequence  $\{(x_t, \tilde{y}_t)\}_{t \in \mathbb{N}}$  with  $\lim_{t \rightarrow \infty} (x_t, \tilde{y}_t) =$   
 1044  $(x, \tilde{y})$ . Since  $p$  is jointly continuous, applying Fatou's lemma [16], we get

$$\tilde{p}(x, \tilde{y}) = \int_{\tilde{\mathcal{Y}}} p(x, \tilde{y}, \hat{y}) d\lambda_{\tilde{\mathcal{Y}}}(\hat{y}) = \int_{\tilde{\mathcal{Y}}} \liminf_{t \rightarrow \infty} p(x_t, \tilde{y}_t, \hat{y}) d\lambda_{\tilde{\mathcal{Y}}}(\hat{y})$$

$$\begin{aligned}
&\leq \liminf_{t \rightarrow \infty} \int_{\tilde{\mathcal{Y}}} p(x_t, \tilde{y}_t, \hat{y}) d\lambda_{\tilde{\mathcal{Y}}}(\hat{y}) \\
&= \liminf_{t \rightarrow \infty} \tilde{p}(x_t, \tilde{y}_t)
\end{aligned} \tag{E.39}$$

i.e.,

$$\tilde{p}(x, \tilde{y}) \leq \liminf_{t \rightarrow \infty} \tilde{p}(x_t, \tilde{y}_t) \tag{E.40}$$

and the result follows.  $\blacksquare$

**Proposition E.2.** *The density  $\tilde{p}$  satisfies:*

$$0 < \int_{\tilde{\mathcal{Y}}} \inf_{\tilde{y} \in \tilde{\mathcal{D}}_r} \tilde{p}(f(\tilde{y}, z)) d\lambda_{\tilde{\mathcal{Y}}}(z) < \infty \tag{E.28}$$

*Proof.* The upper bound is trivial since  $\tilde{p}$  is a probability density and

$$\int_{\tilde{\mathcal{Y}}} \inf_{\tilde{y} \in \tilde{\mathcal{D}}_r} \tilde{p}(f(\tilde{y}, z)) d\lambda_{\tilde{\mathcal{Y}}}(z) \leq \int_{\tilde{\mathcal{Y}}} \tilde{p}(f(\tilde{y}, z)) d\lambda_{\tilde{\mathcal{Y}}}(z) \leq 1 \tag{E.41}$$

For the lower bound, we will show that

$$\inf_{\tilde{y} \in \tilde{\mathcal{D}}_r} \tilde{p}(f(\tilde{y}, z)) > 0 \quad \text{for all } z \in \tilde{\mathcal{Y}}. \tag{E.42}$$

Suppose not, i.e., there exists  $z_0 \in \tilde{\mathcal{Y}}$  such that  $\inf_{\tilde{y} \in \tilde{\mathcal{D}}_r} \tilde{p}(f(\tilde{y}, z_0)) = 0$ . Since  $\tilde{\mathcal{D}}_r$  is compact and  $\tilde{p} \circ f$  is lower semi-continuous, the infimum over  $\tilde{\mathcal{D}}_r$  is realized, meaning that there exists  $\tilde{y}_0 \in \tilde{\mathcal{D}}_r$  such that  $\tilde{p}(f(\tilde{y}_0, z_0)) = 0$ , or, equivalently,

$$\tilde{p}\left(\tilde{Q}(\tilde{y}_0), \gamma^{-1}(z_0 - \tilde{y}_0) - \tilde{v}(\tilde{Q}(\tilde{y}_0))\right) = 0 \tag{E.43}$$

This contradicts [Proposition E.1](#) for  $\mathcal{K} \leftarrow \mathcal{K}_r$ . Finally, since we integrating over a set with positive measure, our result follows.  $\blacksquare$

## F Further numerical results and details

In this section, we present some additional numerical simulations to illustrate and validate our theoretical findings. To this end, we consider two simple yet representative examples: (i) a strongly monotone two-player min-max game on the unit square; and (ii) a finite zero-sum game (as an example of a null-monotone game).

**Strongly monotone.** We consider the strongly monotone two-player min-max game defined by  $f : [0, 1] \times [0, 1] \rightarrow \mathbb{R}$  with

$$f(x_1, x_2) = -(x_1 - 0.5)^2 + 0.5x_1x_2 + 2(x_2 - 0.5)^2 \tag{F.1}$$

and entropic regularization. To be more precise, the payoff functions of the two players are given by  $u_1(x_1, x_2) = f(x_1, x_2) = -u_2(x_1, x_2)$ , and  $x^* = (20/33, 14/33)$  is the unique Nash equilibrium point.

[Fig. 2](#) demonstrates the behavior of (FTRL) under varying step sizes and noise levels for the min-max game defined by the function  $f(x_1, x_2)$ . Specifically, we consider step-sizes  $\gamma \in \{0.1, 0.5\}$ , and stochastic feedback of the form  $\hat{v}_t = v(X_t) + \sigma\omega_t$ , where  $\omega \sim N(0, I_2)$  for  $\sigma \in \{0.5, 1\}$ . For each  $(\gamma, \sigma)$  configuration, we perform  $10^5$  independent trials, each running for  $10^2$  steps. The initial state  $Y_0$  for each trial was drawn uniformly at random from  $[0, 1]^2$ . Each surface represents the empirical density of the final (FTRL) iterates, while the color overlay visualizes their distribution across the  $10^5$  independent trials. Warmer (red) regions indicate higher concentration of final iterates, whereas cooler (blue) regions correspond to lower probability of ending in those regions, as indicated by the colorbar on the side. We observe that smaller step sizes and lower noise levels lead to a tighter concentration of the final iterates around the Nash equilibrium. In contrast, increasing either the step size or the noise variance results in a more dispersed distribution. This behavior aligns with both intuition and our theoretical findings: higher noise introduces greater stochastic variability, while larger step sizes amplify this effect by inducing more aggressive updates that are prone to overshooting, ultimately increasing the spread of the iterates.

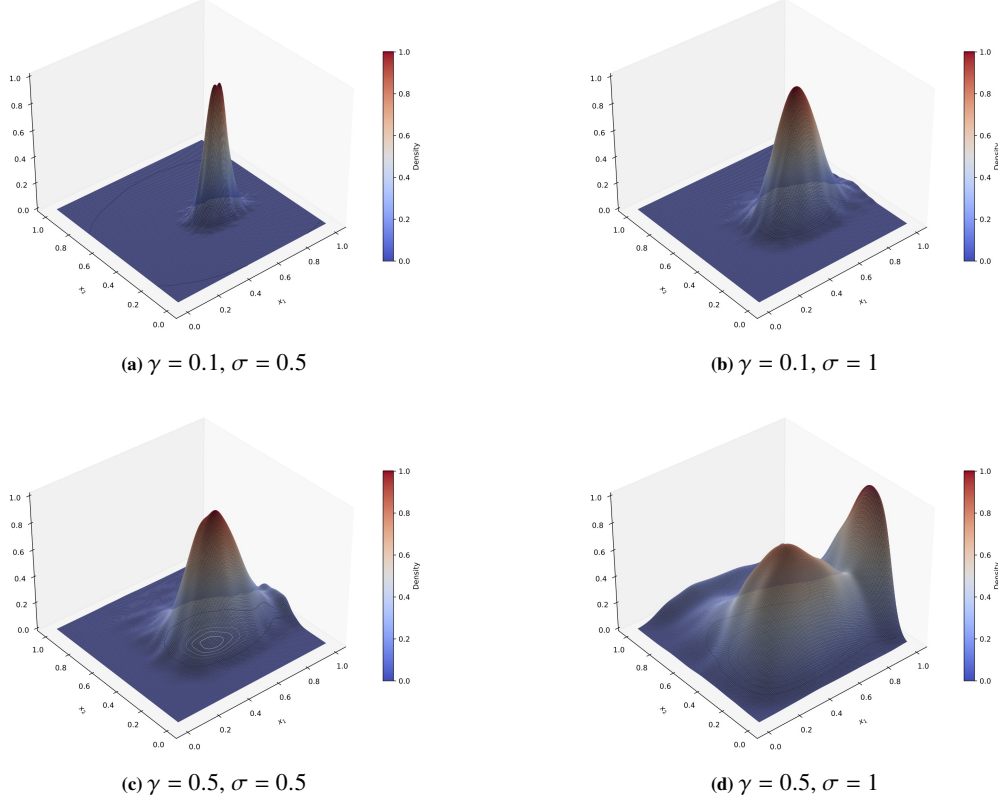

**Figure 2:** Visualization of the long-run occupancy measure for the min-max game with loss-gain function  $f(x_1, x_2)$ . Each plot shows the empirical density of the final iterates of  $10^5$  runs of (FTRL) for  $10^2$  steps, starting from uniformly random initial conditions. The surface plot encodes density via both height and color. Each row corresponds to a different step-size  $\gamma \in \{0.1, 0.5\}$ , while the columns vary the noise level  $\sigma \in \{0.5, 1\}$ .

**Null-monotone.** Fig. 3 shows the empirical distribution of the final iterates under the (FTRL) dynamics in the classic matching pennies game with entropic regularization, played over the probability simplex with payoff matrix

$$P = \begin{bmatrix} (+1, -1) & (-1, +1) \\ (-1, +1) & (+1, -1) \end{bmatrix}.$$

The unique Nash equilibrium of the game is the mixed strategy  $(0.5, 0.5)$  for both players. As before, we consider stochastic feedback of the form  $\hat{v}_t = v(X_t) + \sigma \omega_t$ , where  $\omega \sim N(0, I_2)$  for  $\gamma \in \{0.1, 0.2\}$  and  $\sigma \in \{1, 2\}$ . For each  $(\gamma, \sigma)$  configuration, we perform  $10^5$  independent trials, each running for  $10^2$  steps. Each surface plot corresponds to a different combination of step-size and noise variance, with the empirical density of the final iterates represented through both height and color over the simplex domain. We see that across all configurations, the iterates tend to concentrate near the corners of the simplex, reflecting the instability of the interior equilibrium in the presence of noise. This consistent shift toward extreme points highlights the system’s inherent tendency to escape the central equilibrium under stochastic perturbations.

## G Errata

During the preparation of the supplementary material, we noticed a number of typographic errors and omissions in the main paper that could possibly cause confusion. We clarify those below:

- **L174:** The phrase should read “(S-GDA) is run on the game (6a) with initial condition  $x_0$ ” (the existing syntax is correct, but confusing).
- **L141:** The “ensemble map” should read “ensemble mirror map”.
- **L186:** “Uhlebeck” should read “Uhlenbeck”



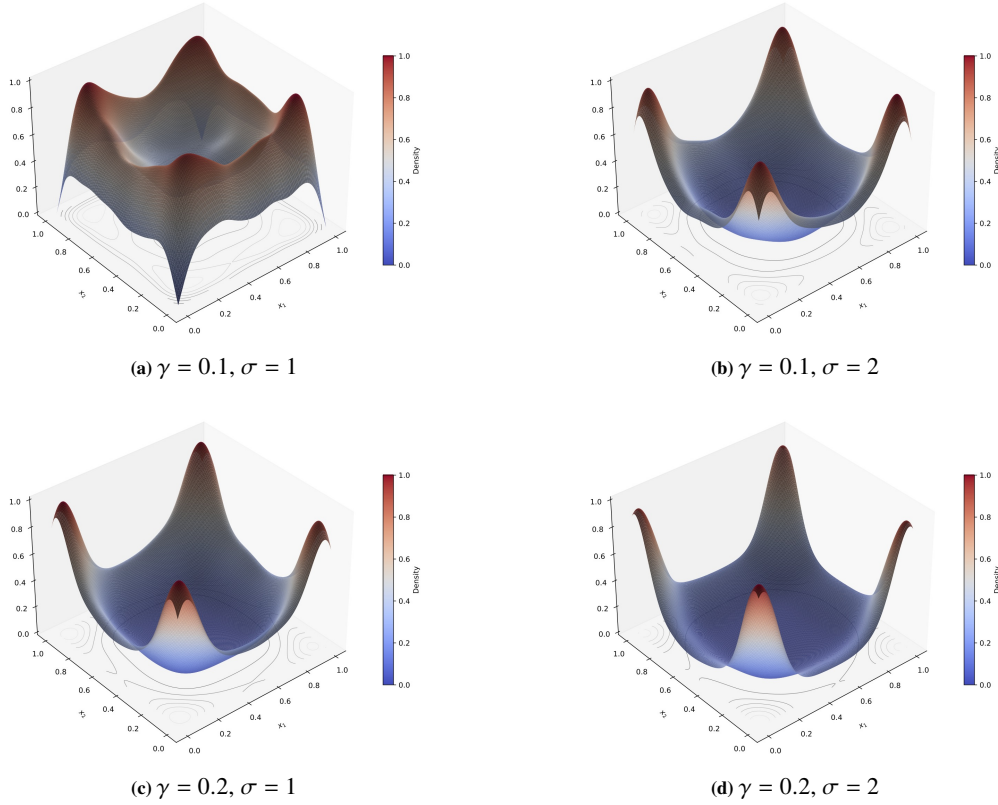

**Figure 3:** Visualization of the long-run occupancy measure for the bilinear game with entropic regularization. Each plot shows the empirical density of the final iterates of  $10^5$  runs of (FTRL) for  $10^2$  steps, starting from uniformly random initial conditions. The surface plot encodes density via both height and color. Each row corresponds to a different step-size  $\gamma \in \{0.1, 0.2\}$ , while the columns vary the noise level  $\sigma \in \{1, 2\}$ .

- **L188:** The phrase should read “(S-GDA) is run on the game (6b) with initial condition  $x_0$ ” (the existing syntax is correct, but confusing).
- **L192:** The phrase should read “centered at 0” (instead of just “centered”)
- **L240–241:** The phrase should “is run with a smooth mirror map  $Q$ ” (this was omitted by mistake) and the phrase “admits an interior equilibrium” should appear in L241.
- **L255:** The phrase should read “except, possibly, its boundary” ( $\mathcal{X}$  may not have a boundary).
- **L282:** The phrase should read “Nevertheless, as we shall see later in this section” (added for clarity)
- **L302:** The phrase should read “the density... is jointly continuous in  $x$  and  $y$ ” (this was omitted by mistake).
- **L306:** The phrase should read “small uniform Gaussian” (added for clarity).
- **References:** Because the submitted file did not contain references cited in the appendix, the number—and numbering—of references has changed.

The errata identified above have all been corrected in the file at hand, and highlighted in red (except for the new references cited in the appendix).

## 1112 NeurIPS Paper Checklist

### 1113 1. Claims

1114 Question: Do the main claims made in the abstract and introduction accurately reflect the paper's  
1115 contributions and scope?

1116 Answer: [\[Yes\]](#)

1117 Justification: It can be found in [Section 3](#), [Section 4](#) and the appendix.

1118 Guidelines:

- 1119 • The answer NA means that the abstract and introduction do not include the claims made in the  
1120 paper.
- 1121 • The abstract and/or introduction should clearly state the claims made, including the contributions  
1122 made in the paper and important assumptions and limitations. A No or NA answer to this  
1123 question will not be perceived well by the reviewers.
- 1124 • The claims made should match theoretical and experimental results, and reflect how much the  
1125 results can be expected to generalize to other settings.
- 1126 • It is fine to include aspirational goals as motivation as long as it is clear that these goals are not  
1127 attained by the paper.

### 1128 2. Limitations

1129 Question: Does the paper discuss the limitations of the work performed by the authors?

1130 Answer: [\[Yes\]](#)

1131 Justification: It can be found in [Section 1](#).

1132 Guidelines:

- 1133 • The answer NA means that the paper has no limitation while the answer No means that the  
1134 paper has limitations, but those are not discussed in the paper.
- 1135 • The authors are encouraged to create a separate "Limitations" section in their paper.
- 1136 • The paper should point out any strong assumptions and how robust the results are to violations of  
1137 these assumptions (e.g., independence assumptions, noiseless settings, model well-specification,  
1138 asymptotic approximations only holding locally). The authors should reflect on how these  
1139 assumptions might be violated in practice and what the implications would be.
- 1140 • The authors should reflect on the scope of the claims made, e.g., if the approach was only tested  
1141 on a few datasets or with a few runs. In general, empirical results often depend on implicit  
1142 assumptions, which should be articulated.
- 1143 • The authors should reflect on the factors that influence the performance of the approach. For  
1144 example, a facial recognition algorithm may perform poorly when image resolution is low or  
1145 images are taken in low lighting. Or a speech-to-text system might not be used reliably to  
1146 provide closed captions for online lectures because it fails to handle technical jargon.
- 1147 • The authors should discuss the computational efficiency of the proposed algorithms and how  
1148 they scale with dataset size.
- 1149 • If applicable, the authors should discuss possible limitations of their approach to address  
1150 problems of privacy and fairness.
- 1151 • While the authors might fear that complete honesty about limitations might be used by reviewers  
1152 as grounds for rejection, a worse outcome might be that reviewers discover limitations that  
1153 aren't acknowledged in the paper. The authors should use their best judgment and recognize  
1154 that individual actions in favor of transparency play an important role in developing norms that  
1155 preserve the integrity of the community. Reviewers will be specifically instructed to not penalize  
1156 honesty concerning limitations.

### 1157 3. Theory assumptions and proofs

1158 Question: For each theoretical result, does the paper provide the full set of assumptions and a  
1159 complete (and correct) proof?

1160 Answer: [\[Yes\]](#)

1161 Justification: It can be found in [Section 3](#), [Section 4](#) and the appendix.

1162 Guidelines:

- 1163 • The answer NA means that the paper does not include theoretical results.

- All the theorems, formulas, and proofs in the paper should be numbered and cross-referenced.
- All assumptions should be clearly stated or referenced in the statement of any theorems.
- The proofs can either appear in the main paper or the supplemental material, but if they appear in the supplemental material, the authors are encouraged to provide a short proof sketch to provide intuition.
- Inversely, any informal proof provided in the core of the paper should be complemented by formal proofs provided in appendix or supplemental material.
- Theorems and Lemmas that the proof relies upon should be properly referenced.

#### 1172 4. Experimental result reproducibility

1173 Question: Does the paper fully disclose all the information needed to reproduce the main experi-  
1174 mental results of the paper to the extent that it affects the main claims and/or conclusions of the  
1175 paper (regardless of whether the code and data are provided or not)?

1176 Answer: [Yes]

1177 Justification: It can be found in [Appendix F](#), and the code is included in the supplemental material.

1178 Guidelines:

- The answer NA means that the paper does not include experiments.
- If the paper includes experiments, a No answer to this question will not be perceived well by the reviewers: Making the paper reproducible is important, regardless of whether the code and data are provided or not.
- If the contribution is a dataset and/or model, the authors should describe the steps taken to make their results reproducible or verifiable.
- Depending on the contribution, reproducibility can be accomplished in various ways. For example, if the contribution is a novel architecture, describing the architecture fully might suffice, or if the contribution is a specific model and empirical evaluation, it may be necessary to either make it possible for others to replicate the model with the same dataset, or provide access to the model. In general, releasing code and data is often one good way to accomplish this, but reproducibility can also be provided via detailed instructions for how to replicate the results, access to a hosted model (e.g., in the case of a large language model), releasing of a model checkpoint, or other means that are appropriate to the research performed.
- While NeurIPS does not require releasing code, the conference does require all submissions to provide some reasonable avenue for reproducibility, which may depend on the nature of the contribution. For example
  - (a) If the contribution is primarily a new algorithm, the paper should make it clear how to reproduce that algorithm.
  - (b) If the contribution is primarily a new model architecture, the paper should describe the architecture clearly and fully.
  - (c) If the contribution is a new model (e.g., a large language model), then there should either be a way to access this model for reproducing the results or a way to reproduce the model (e.g., with an open-source dataset or instructions for how to construct the dataset).
  - (d) We recognize that reproducibility may be tricky in some cases, in which case authors are welcome to describe the particular way they provide for reproducibility. In the case of closed-source models, it may be that access to the model is limited in some way (e.g., to registered users), but it should be possible for other researchers to have some path to reproducing or verifying the results.

#### 1208 5. Open access to data and code

1209 Question: Does the paper provide open access to the data and code, with sufficient instructions to  
1210 faithfully reproduce the main experimental results, as described in supplemental material?

1211 Answer: [Yes]

1212 Justification: The code is included in the supplemental material.

1213 Guidelines:

- The answer NA means that paper does not include experiments requiring code.
- Please see the NeurIPS code and data submission guidelines (<https://nips.cc/public/guides/CodeSubmissionPolicy>) for more details.

- While we encourage the release of code and data, we understand that this might not be possible, so “No” is an acceptable answer. Papers cannot be rejected simply for not including code, unless this is central to the contribution (e.g., for a new open-source benchmark).
- The instructions should contain the exact command and environment needed to run to reproduce the results. See the NeurIPS code and data submission guidelines (<https://nips.cc/public/guides/CodeSubmissionPolicy>) for more details.
- The authors should provide instructions on data access and preparation, including how to access the raw data, preprocessed data, intermediate data, and generated data, etc.
- The authors should provide scripts to reproduce all experimental results for the new proposed method and baselines. If only a subset of experiments are reproducible, they should state which ones are omitted from the script and why.
- At submission time, to preserve anonymity, the authors should release anonymized versions (if applicable).
- Providing as much information as possible in supplemental material (appended to the paper) is recommended, but including URLs to data and code is permitted.

## 6. Experimental setting/details

Question: Does the paper specify all the training and test details (e.g., data splits, hyperparameters, how they were chosen, type of optimizer, etc.) necessary to understand the results?

Answer: [Yes]

Justification: It can be found in [Appendix F](#).

Guidelines:

- The answer NA means that the paper does not include experiments.
- The experimental setting should be presented in the core of the paper to a level of detail that is necessary to appreciate the results and make sense of them.
- The full details can be provided either with the code, in appendix, or as supplemental material.

## 7. Experiment statistical significance

Question: Does the paper report error bars suitably and correctly defined or other appropriate information about the statistical significance of the experiments?

Answer: [NA]

Justification: No statistical significance applicable.

Guidelines:

- The answer NA means that the paper does not include experiments.
- The authors should answer "Yes" if the results are accompanied by error bars, confidence intervals, or statistical significance tests, at least for the experiments that support the main claims of the paper.
- The factors of variability that the error bars are capturing should be clearly stated (for example, train/test split, initialization, random drawing of some parameter, or overall run with given experimental conditions).
- The method for calculating the error bars should be explained (closed form formula, call to a library function, bootstrap, etc.)
- The assumptions made should be given (e.g., Normally distributed errors).
- It should be clear whether the error bar is the standard deviation or the standard error of the mean.
- It is OK to report 1-sigma error bars, but one should state it. The authors should preferably report a 2-sigma error bar than state that they have a 96% CI, if the hypothesis of Normality of errors is not verified.
- For asymmetric distributions, the authors should be careful not to show in tables or figures symmetric error bars that would yield results that are out of range (e.g. negative error rates).
- If error bars are reported in tables or plots, The authors should explain in the text how they were calculated and reference the corresponding figures or tables in the text.

## 8. Experiments compute resources

Question: For each experiment, does the paper provide sufficient information on the computer resources (type of compute workers, memory, time of execution) needed to reproduce the experiments?

1271 Answer: [Yes]  
 1272 Justification: It can be found in [Appendix F](#).  
 1273 Guidelines:  
 1274 • The answer NA means that the paper does not include experiments.  
 1275 • The paper should indicate the type of compute workers CPU or GPU, internal cluster, or cloud  
 1276 provider, including relevant memory and storage.  
 1277 • The paper should provide the amount of compute required for each of the individual experimental  
 1278 runs as well as estimate the total compute.  
 1279 • The paper should disclose whether the full research project required more compute than the  
 1280 experiments reported in the paper (e.g., preliminary or failed experiments that didn't make it  
 1281 into the paper).

1282 **9. Code of ethics**  
 1283 Question: Does the research conducted in the paper conform, in every respect, with the NeurIPS  
 1284 Code of Ethics <https://neurips.cc/public/EthicsGuidelines?>  
 1285 Answer: [Yes]  
 1286 Justification: The paper conforms with the NeurIPS Code of Ethics.  
 1287 Guidelines:  
 1288 • The answer NA means that the authors have not reviewed the NeurIPS Code of Ethics.  
 1289 • If the authors answer No, they should explain the special circumstances that require a deviation  
 1290 from the Code of Ethics.  
 1291 • The authors should make sure to preserve anonymity (e.g., if there is a special consideration due  
 1292 to laws or regulations in their jurisdiction).

1293 **10. Broader impacts**  
 1294 Question: Does the paper discuss both potential positive societal impacts and negative societal  
 1295 impacts of the work performed?  
 1296 Answer: [NA]  
 1297 Justification: There is no societal impact.  
 1298 Guidelines:  
 1299 • The answer NA means that there is no societal impact of the work performed.  
 1300 • If the authors answer NA or No, they should explain why their work has no societal impact or  
 1301 why the paper does not address societal impact.  
 1302 • Examples of negative societal impacts include potential malicious or unintended uses (e.g.,  
 1303 disinformation, generating fake profiles, surveillance), fairness considerations (e.g., deploy-  
 1304 ment of technologies that could make decisions that unfairly impact specific groups), privacy  
 1305 considerations, and security considerations.  
 1306 • The conference expects that many papers will be foundational research and not tied to par-  
 1307 ticular applications, let alone deployments. However, if there is a direct path to any negative  
 1308 applications, the authors should point it out. For example, it is legitimate to point out that  
 1309 an improvement in the quality of generative models could be used to generate deepfakes for  
 1310 disinformation. On the other hand, it is not needed to point out that a generic algorithm for  
 1311 optimizing neural networks could enable people to train models that generate Deepfakes faster.  
 1312 • The authors should consider possible harms that could arise when the technology is being used  
 1313 as intended and functioning correctly, harms that could arise when the technology is being used  
 1314 as intended but gives incorrect results, and harms following from (intentional or unintentional)  
 1315 misuse of the technology.  
 1316 • If there are negative societal impacts, the authors could also discuss possible mitigation strategies  
 1317 (e.g., gated release of models, providing defenses in addition to attacks, mechanisms for  
 1318 monitoring misuse, mechanisms to monitor how a system learns from feedback over time,  
 1319 improving the efficiency and accessibility of ML).

1320 **11. Safeguards**  
 1321 Question: Does the paper describe safeguards that have been put in place for responsible release of  
 1322 data or models that have a high risk for misuse (e.g., pretrained language models, image generators,  
 1323 or scraped datasets)?

1324 Answer: [NA]  
 1325 Justification: There are no such risks.  
 1326 Guidelines:  
 1327 • The answer NA means that the paper poses no such risks.  
 1328 • Released models that have a high risk for misuse or dual-use should be released with necessary  
 1329 safeguards to allow for controlled use of the model, for example by requiring that users adhere  
 1330 to usage guidelines or restrictions to access the model or implementing safety filters.  
 1331 • Datasets that have been scraped from the Internet could pose safety risks. The authors should  
 1332 describe how they avoided releasing unsafe images.  
 1333 • We recognize that providing effective safeguards is challenging, and many papers do not require  
 1334 this, but we encourage authors to take this into account and make a best faith effort.

1335 **12. Licenses for existing assets**  
 1336 Question: Are the creators or original owners of assets (e.g., code, data, models), used in the  
 1337 paper, properly credited and are the license and terms of use explicitly mentioned and properly  
 1338 respected?  
 1339 Answer: [NA]  
 1340 Justification: The paper does not use existing assets.  
 1341 Guidelines:  
 1342 • The answer NA means that the paper does not use existing assets.  
 1343 • The authors should cite the original paper that produced the code package or dataset.  
 1344 • The authors should state which version of the asset is used and, if possible, include a URL.  
 1345 • The name of the license (e.g., CC-BY 4.0) should be included for each asset.  
 1346 • For scraped data from a particular source (e.g., website), the copyright and terms of service of  
 1347 that source should be provided.  
 1348 • If assets are released, the license, copyright information, and terms of use in the package should  
 1349 be provided. For popular datasets, [paperswithcode.com/datasets](https://paperswithcode.com/datasets) has curated licenses for  
 1350 some datasets. Their licensing guide can help determine the license of a dataset.  
 1351 • For existing datasets that are re-packaged, both the original license and the license of the derived  
 1352 asset (if it has changed) should be provided.  
 1353 • If this information is not available online, the authors are encouraged to reach out to the asset's  
 1354 creators.

1355 **13. New assets**  
 1356 Question: Are new assets introduced in the paper well documented and is the documentation  
 1357 provided alongside the assets?  
 1358 Answer: [NA]  
 1359 Justification: The paper does not release new assets.  
 1360 Guidelines:  
 1361 • The answer NA means that the paper does not release new assets.  
 1362 • Researchers should communicate the details of the dataset/code/model as part of their sub-  
 1363 missions via structured templates. This includes details about training, license, limitations,  
 1364 etc.  
 1365 • The paper should discuss whether and how consent was obtained from people whose asset is  
 1366 used.  
 1367 • At submission time, remember to anonymize your assets (if applicable). You can either create  
 1368 an anonymized URL or include an anonymized zip file.

1369 **14. Crowdsourcing and research with human subjects**  
 1370 Question: For crowdsourcing experiments and research with human subjects, does the paper  
 1371 include the full text of instructions given to participants and screenshots, if applicable, as well as  
 1372 details about compensation (if any)?  
 1373 Answer: [NA]  
 1374 Justification: The paper does not involve crowdsourcing nor research with human subjects.  
 1375 Guidelines:



1376 • The answer NA means that the paper does not involve crowdsourcing nor research with human  
1377 subjects.

1378 • Including this information in the supplemental material is fine, but if the main contribution of  
1379 the paper involves human subjects, then as much detail as possible should be included in the  
1380 main paper.

1381 • According to the NeurIPS Code of Ethics, workers involved in data collection, curation, or other  
1382 labor should be paid at least the minimum wage in the country of the data collector.

1383 **15. Institutional review board (IRB) approvals or equivalent for research with human subjects**

1384 Question: Does the paper describe potential risks incurred by study participants, whether such  
1385 risks were disclosed to the subjects, and whether Institutional Review Board (IRB) approvals  
1386 (or an equivalent approval/review based on the requirements of your country or institution) were  
1387 obtained?

1388 Answer: [NA]

1389 Justification: The paper does not involve crowdsourcing nor research with human subjects.

1390 Guidelines:

1391 • The answer NA means that the paper does not involve crowdsourcing nor research with human  
1392 subjects.

1393 • Depending on the country in which research is conducted, IRB approval (or equivalent) may be  
1394 required for any human subjects research. If you obtained IRB approval, you should clearly  
1395 state this in the paper.

1396 • We recognize that the procedures for this may vary significantly between institutions and  
1397 locations, and we expect authors to adhere to the NeurIPS Code of Ethics and the guidelines for  
1398 their institution.

1399 • For initial submissions, do not include any information that would break anonymity (if applica-  
1400 ble), such as the institution conducting the review.

1401 **16. Declaration of LLM usage**

1402 Question: Does the paper describe the usage of LLMs if it is an important, original, or non-  
1403 standard component of the core methods in this research? Note that if the LLM is used only for  
1404 writing, editing, or formatting purposes and does not impact the core methodology, scientific  
1405 rigor, or originality of the research, declaration is not required.

1406 Answer: [NA]

1407 Justification: The core method development in this research does not involve LLMs as any  
1408 important, original, or non-standard components.

1409 Guidelines:

1410 • The answer NA means that the core method development in this research does not involve LLMs  
1411 as any important, original, or non-standard components.

1412 • Please refer to our LLM policy (<https://neurips.cc/Conferences/2025/LLM>) for what  
1413 should or should not be described.
